# Supplementary material
Source: PubMed Central journal article supplement (PMC4407268)
Supplement: mmc1.pdf [file mmc1.pdf]

# Supplementary Material for:

## Characterization of Lipid-Binding Site of Equinatoxin II by NMR and Molecular Dynamics Simulation

Daniel K. Weber<sup>a</sup>, Shenggen Yao<sup>b</sup>, Nejc Rojko<sup>c</sup>, Gregor Anderluh<sup>c</sup>, Terry P. Lybrand<sup>d</sup>,  
Matthew T. Downton<sup>e</sup>, John Wagner<sup>e</sup> and Frances Separovic<sup>a</sup>

<sup>a</sup> *School of Chemistry, Bio21 Institute, University of Melbourne, VIC 3010, Australia*

<sup>b</sup> *Bio21 Institute, University of Melbourne, VIC 3010, Australia*

<sup>c</sup> *Laboratory for Molecular Biology & Nanobiotechnology, National Institute of Chemistry,  
Ljubljana, Slovenia*

<sup>d</sup> *Center for Structural Biology, Department of Chemistry, Vanderbilt University, Nashville TN,  
37232-8725*

<sup>e</sup> *IBM Research Collaboratory for Life Sciences, Victorian Life Sciences Computation  
Initiative, University of Melbourne, VIC 3010, Australia*

### Contents

|                          |    |
|--------------------------|----|
| 1. Figure S1 & Table S1  | S2 |
| 2. Table S2 & TableS3    | S3 |
| 3. Figure S2             | S4 |
| 4. Table S4              | S5 |
| 5. Figure S3             | S6 |
| 6. Figure S4 & Figure S5 | S7 |

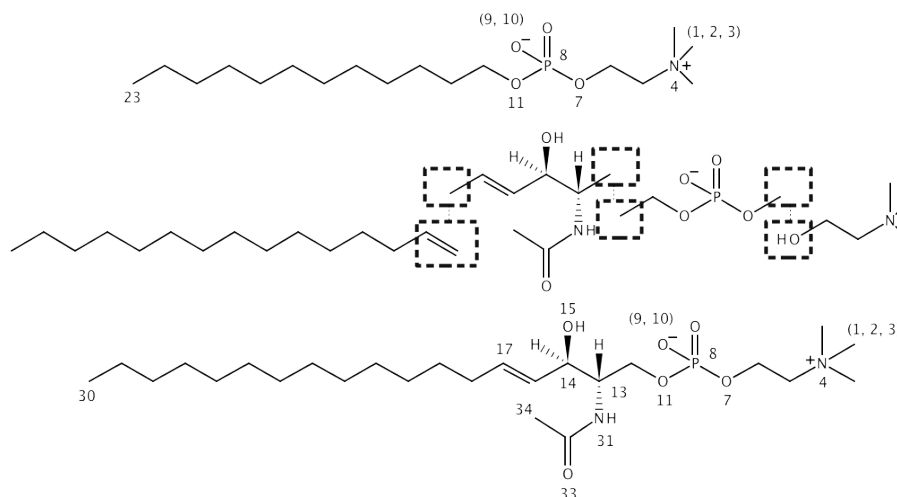

Figure S1: DPC schematic and atom nomenclature (upper). Fragment-based RESP derivation scheme used to for Ac-SM (lower).

Table S1: RESP charges and assigned GAFF/GAFFlipid atom types for DPC.

| Name            | Type | Charge  | Name      | Type | Charge  |
|-----------------|------|---------|-----------|------|---------|
| C1-C3           | c3   | -0.1438 | H15 [AIB] | hl   | -0.0121 |
| [H1-H3] [AIBIC] | hc   | 0.1235  | C16       | a3   | 0.0351  |
| N4              | n4   | 0.029   | H16 [AIB] | hl   | -0.0099 |
| C5              | c3   | -0.036  | C17       | a3   | 0.0113  |
| H5 [AIB]        | hc   | 0.1324  | H17 [AIB] | hl   | -0.0043 |
| C6              | c3   | 0.1414  | C18       | a3   | 0.0169  |
| H6 [AIB]        | hc   | 0.0548  | H18 [AIB] | hl   | -0.0092 |
| O7              | os   | -0.5766 | C19       | a3   | 0.0178  |
| P8              | p5   | 1.2266  | H19 [AIB] | hl   | -0.0101 |
| O9, O10         | o    | -0.797  | C20       | a3   | 0.0105  |
| O11             | os   | -0.5059 | H20 [AIB] | hl   | -0.0073 |
| C12             | a3   | 0.1847  | C21       | a3   | 0.0064  |
| H12 [AIB]       | hl   | 0.0059  | H21 [AIB] | hl   | 0.0002  |
| C13             | a3   | 0.0229  | C22       | a3   | 0.038   |
| H13 [AIB]       | hl   | 0.0324  | H22 [AIB] | hl   | -0.0042 |
| C14             | a3   | -0.0182 | C23       | a3   | -0.0775 |
| H14 [AIB]       | hl   | -0.0047 | H23 [AIB] | hl   | 0.0153  |
| C15             | a3   | 0.0138  |           |      |         |

Table S2: RESP charges and assigned GAFF/GAFFlipid atom types for Ac-SM.

| Name            | Type | Charge  | Name        | Type | Charge  |
|-----------------|------|---------|-------------|------|---------|
| C1-C3           | c3   | -0.143  | H20 [AIB]   | hl   | -0.0092 |
| [H1-H3] [AIBIC] | hc   | 0.1231  | C21         | a3   | 0.0255  |
| N4              | n4   | 0.0315  | H21 [AIB]   | hl   | -0.0108 |
| C5              | c3   | -0.0363 | C22         | a3   | 0.0158  |
| H5 [AIB]        | hc   | 0.1329  | H22 [AIB]   | hl   | -0.009  |
| C6              | c3   | 0.1258  | C23         | a3   | 0.0158  |
| H6 [AIB]        | hc   | 0.0594  | H23 [AIB]   | hl   | -0.009  |
| O7              | os   | -0.5005 | C24         | a3   | 0.0255  |
| P8              | p5   | 1.2328  | H24 [AIB]   | hl   | -0.0108 |
| O9, O10         | o    | -0.8009 | C25         | a3   | 0.0183  |
| O11             | os   | -0.5146 | H25 [AIB]   | hl   | -0.0086 |
| C12             | c3   | 0.2501  | C26         | a3   | 0.0158  |
| H12 [AIB]       | hc   | 0.0001  | H26 [AIB]   | hl   | -0.009  |
| C13             | c3   | -0.03   | C27         | a3   | 0.0158  |
| H13A            | hc   | 0.135   | H27 [AIB]   | hl   | -0.009  |
| C14             | c3   | 0.1385  | C28         | a3   | 0.003   |
| H14A            | hc   | 0.0925  | H28 [AIB]   | hl   | 0       |
| O15             | oh   | -0.6264 | C29         | a3   | 0.0442  |
| H15A            | ho   | 0.4203  | H29 [AIB]   | hl   | -0.0055 |
| C16             | c2   | -0.1899 | C30         | a3   | -0.0801 |
| H16A            | hc   | 0.1871  | H30 [AIBIC] | hl   | 0.0152  |
| C17             | c2   | -0.1627 | N31         | n    | -0.5588 |
| H17A            | hc   | 0.1244  | H31A        | hn   | 0.2854  |
| C18             | a3   | -0.0446 | C32         | c    | 0.6949  |
| H18 [AIB]       | hl   | 0.0394  | O33         | o    | -0.5892 |
| C19             | a3   | 0.0278  | C34         | a3   | -0.3083 |
| H19 [AIB]       | hl   | 0.0012  | H34 [AIBIC] | hl   | 0.0903  |
| C20             | a3   | 0.0178  |             |      |         |

Table S3: Additional simulation details

| Simulation                       | Atoms         | Waters        | Ions              | Time (ns) |
|----------------------------------|---------------|---------------|-------------------|-----------|
| EqII only <sup>a</sup>           | 28137         | 8465          | 7 Cl <sup>-</sup> | 100       |
| Ac-SM <sub>54</sub> <sup>b</sup> | 27633         | 7681          | -                 | 60        |
| EqII + DPC <sub>54</sub>         | 44247 / 60423 | 12737 / 18129 | 7 Cl <sup>-</sup> | 220 / 200 |
| EqII + Ac-SM <sub>54</sub>       | 57681 / 84723 | 16783 / 25797 | 7 Cl <sup>-</sup> | 220 / 200 |

<sup>a</sup> Chain A of PDB 1IAZ was used as the starting structure and solvated with 11 Å truncated octahedron. Simulations were run as described in text (9 Å cutoff used).

<sup>b</sup> Starting configuration was an interdigitated bilayer of Ac-SM units hydrated with an 8 Å shell of TIP3P water. Simulations were run as described in text (12 Å cutoff used).

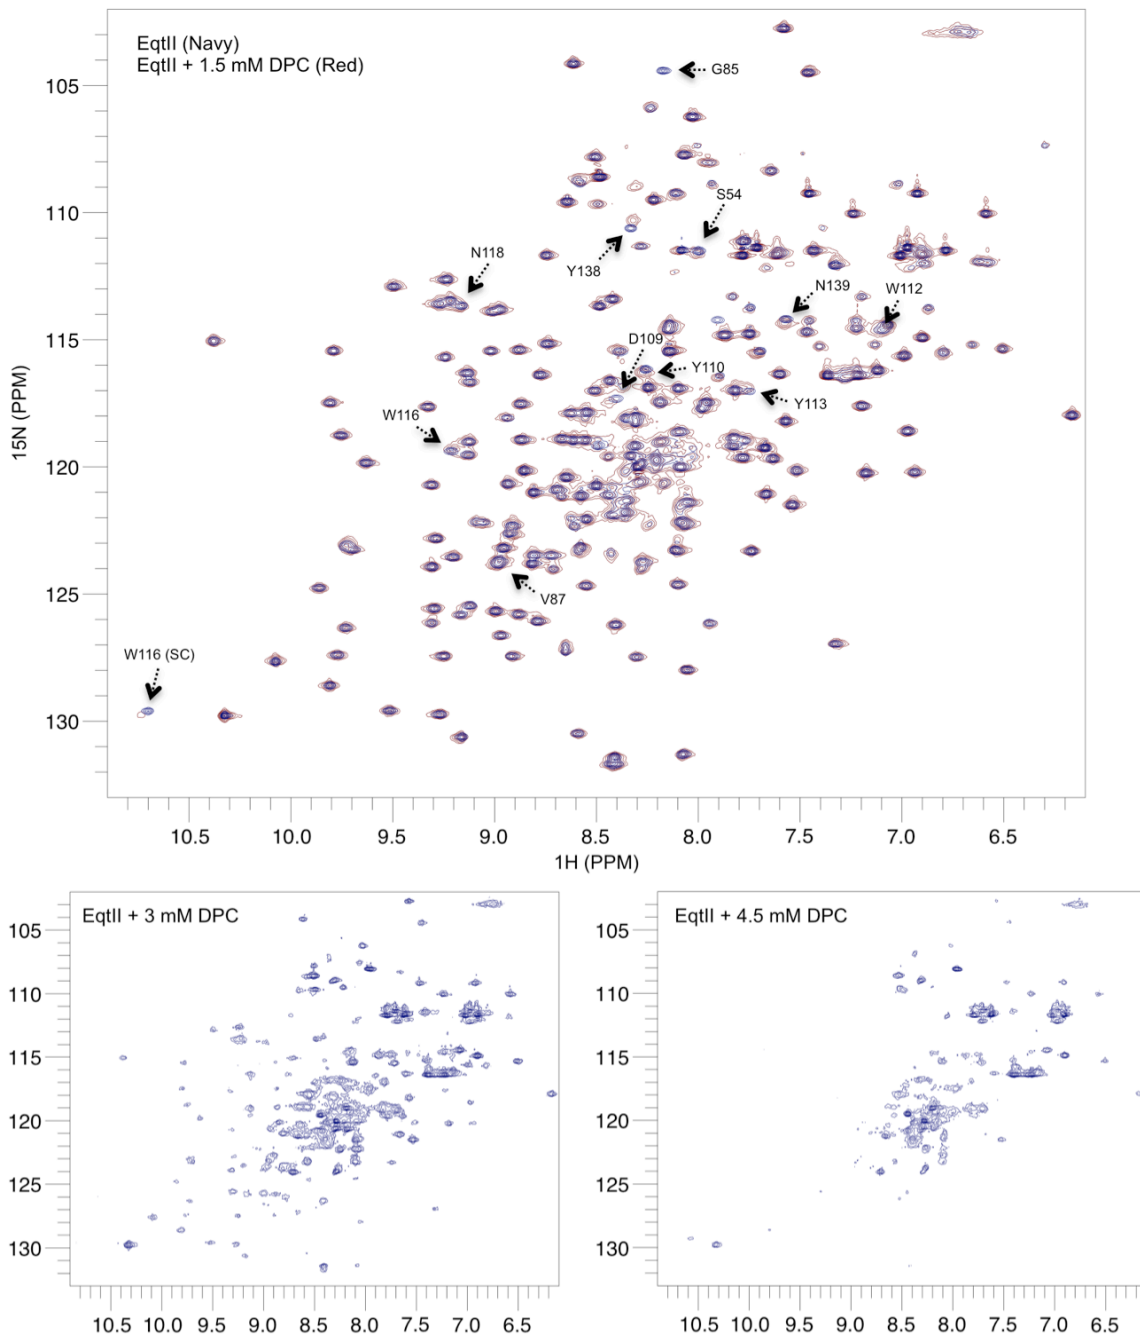

Figure S2:  $^1\text{H}$ - $^{15}\text{N}$  HSQC spectra of 0.3 mM EqtlI in buffer (10 mM sodium phosphate, 20 mM NaCl, 0.02%  $\text{NaN}_3$ , 10%  $\text{D}_2\text{O}$ , pH 5.0) show specific perturbations to loop  $\beta$ 3- $\beta$ 4 (S54), strand  $\beta$ 6 (G85, A87), loop  $\beta$ 7- $\beta$ 8 (D109, Y110, W112, Y113), strand  $\beta$ 8 (W116, W116  $\text{N}\epsilon/\text{H}\epsilon$ , N118) and helix  $\alpha$ 2 (Y138, N139) regions at the CMC of DPC (*upper*). DPC concentration exceeding the CMC caused considerable reduction in spectral quality (*lower*).

### Force field comparisons

Table S4: Force-field comparison of dihedral parameters for selected DPC atoms as measured by relative trans population (%)<sup>a</sup>.

| Selected Atoms  | AMBER99SB<br>(Abel et al.) | Amber99SB <sup>b</sup> | GAFF <sup>b</sup> | GAFFlipid <sup>b</sup> |
|-----------------|----------------------------|------------------------|-------------------|------------------------|
| N4 C5 C6 O7     | 17.8                       | 30.3                   | 20.6              | 21.3                   |
| C5 C6 O7 P8     | 83.6                       | 87.6                   | 94.2              | 94.8                   |
| C6 O7 P8 O11    | 9.0                        | 21.9                   | 58.6              | 56.7                   |
| O7 P8 O11 C12   | 6.0                        | 25.3                   | 65.1              | 80.5                   |
| P8 O11 C12 C13  | 12.0                       | 93.4                   | 91.4              | 90.8                   |
| O11 C12 C13 C14 | 70.0                       | 51.3                   | 49.1              | 65.2                   |
| C12 C13 C14 C15 | -                          | 79.6                   | 80.8              | 74.3                   |
| C13 C14 C15 C16 | -                          | 81.5                   | 79.7              | 73.9                   |
| C14 C15 C16 C17 | -                          | 84.8                   | 81.0              | 75.6                   |
| C15 C16 C17 C18 | -                          | 85.5                   | 80.9              | 73.6                   |
| C16 C17 C18 C19 | -                          | 86.9                   | 82.3              | 74.7                   |
| C17 C18 C19 C20 | -                          | 86.8                   | 81.7              | 74.0                   |
| C18 C19 C20 C21 | -                          | 86.1                   | 82.6              | 74.0                   |
| C19 C20 C21 C22 | -                          | 83.3                   | 80.8              | 73.1                   |
| C20 C21 C22 C23 | -                          | 79.5                   | 76.4              | 68.3                   |
| C C C C         | 84.3                       | 83.8                   | 80.7              | 73.5                   |

<sup>a</sup> Dihedral angles were measured for each DPC residue over the final 30 ns (3000 snapshots) of a 40 ns trajectory. Trans dihedral angles were defined as occurring between  $-180^\circ$  to  $-90^\circ$  and  $90^\circ$  to  $180^\circ$ .

<sup>b</sup> Simulations were prepared by solvating an equilibrated DPC micelle in an 8 Å shell of TIP3P water. Production runs utilized the same conditions as defined in the main text. The system consisted of 17778 total atoms and 4828 water molecules.

```

EqII/1-179      1 -- SADVAGAVI DGASL SFDI L KTVL EALGNV KR K I AVGV DNE SG KTWTALNTYFRSGTSDI 59
TonC/1-179     1 -- SADVAGAVI DGASL SFDI L KTVL EALGNV KR K I AVGV DNE SG KTWTALNTYFRSGTSDI 59
FraC/1-179     1 -- SADVAGAVI DGAGL GFDV L KTVL EALGNV KR K I AVG I DNE SG KTWTAMNTYFRSGTSDI 59
EqII/1-179     1 -- SVAVAGAI I KGAA LTFNV L QTVL KALGD I BR K I AVGV DNE SG KTWTALNTYFRSGTSDI 59
EqII/1-179     1 -- SVAVAGAVI EGAT LTFNV L QTVL KALGD I BR K I AVG I DNE SG MTWTAMNTYFRSGTSDV 59
Bpl/1-179      1 -- SLAVAGAVI EGGN LVMSV DR I EA I GD VNR K I A IGV ENQ SG KSWTAMNTYFRSGTSDV 59
Or-G/1-173     1 - - - - - GAI I AGAA L GFNVHQTV L KALGQVSR K I A IGV DNE SG GTWTALNAYFRSGT D V 54
Or-A/1-165     1 - - - - - ATFRV L AKVL AELG K VSR K I AVGV DNE SG GSWTALNAYFRSGT D V 46
Sti/1-175     1 - - - - - ALAGT I IAGAS L TFOV L DKVL EELG K VSR K I AVG I DNE SG GTWTALNAYFRSGT D V 57
RTX-Sti/1-177 1 - - SAALAGT I IAGAS L GFQI LDKVL GELG K VSR K I AVGV DNE SG GSWTALNAYFRSGT D V 59
RTX-A/1-175   1 - - - - - ALAGA I IAGAS L TFOI LDKVL AELGQVSR K I A IGV DNE SG GSWTAMNAYFRSGT D V 57
HmgII/1-177   1 - - SAALAGT I IEGAS L GFQI LDKVL GELG K VSR K I AVGV DNE SG GSWTALNAYFRSGT D V 59
HmT/1-177     1 - - SAALAGT I IAGAS L GFQI LDKVL GELG K VSR K I A IGV DNE SG GSTTALNAYFRSGT D V 59
Sti/1-176     1 - - - SELAGT I IAGAS L TFEV LDKVL GELG K VSR K I AVG I DNE SG GTWTALNAYFRSGT D V 58
Avi/1-179     1 - - SAAVAGAVI AGGEL ALK I LTK I DEIG K I DR K I A IGV DNE SGLKWTALNTYKSGASDV 59
PsTX-20A/1-179 1 - - SAAVAGAVI AGGEL ALK I LTK I DEIG K I DR K I A IGV DNE SGLKWTALNTYKSGASDV 59
Avi/1-181     1 KKSAAVAGAVI AGGEL ALK I LTK I DEIG K I DR K I A IGV DNE SGLKWTALNTYKSGASDV 61
Src/1-178     1 - - - KAI SGGTV I AAGR L TLDL KTL G T LGS I BR K I A IGV DNE TGG I TGN NVYFRSGTSD 58

EqII/1-179     60 V LPHKVPHG KALLYNGQ KDRG PVATGAVGVLAY LMSDGN TLAVL FSVR YDYNWY SNWVN VR 120
TonC/1-179     60 V LPHKVPHG KALLYNGQ KDRG PVATGAVGVLAY LMSDGN TLAVL FSVR YDYNWY SNWVN VR 120
FraC/1-179     60 V LPHKVAHG KALLYNGQ KNRG PVATG VVGVI AYMSDGN TLAVL FSVR YDYNWY SNWVN VR 120
EqII/1-179     60 V LPHKVPHG KALLYNGQ KDRG PVATGAVGVLAY AMSDGN TLAVL FSVR YDYNWY SNWVN VR 120
EqII/1-179     60 I LPHTVPHG KALLYNGQ KDRG PVATG VVGVLAY AMSDGN TLAVL FSI PEDYNLY SNWVN VK 120
Bpl/1-179      60 V LPHSVPSG KALLYDGG KTRG PVATG VVGVFAY AMSDGN TLAVMFSI RYDYNLY SNWVN VK 120
Or-G/1-173     55 I LPEFVFNQ KALLYSGQ KDTG PVATGAVGVLAY YMSDGN TLGVMF SVRFDYNLY SNWWD VK 115
Or-A/1-165     47 I LPLDLPNQ KALLYRGG KDTG PVATG VVGVLAY AMSDGN TLAIL FSVR YDYNLY SNWVN VK 107
Sti/1-175     58 I LPEFVFNQ KALLYSGR KDTG PVATGAVAAFA YMSDGN TLGVMF SVRFDYNLY SNWWD VK 118
RTX-Sti/1-177 60 I LPEFVFNQ KALLYSGR KDTG PVATGAVAAFA YMSDGN TLGVMF SVRFDYNLY SNWWD VK 120
RTX-A/1-175   58 I LPEFVFNQ KALLYSGR KNRG PD TGA V GALAY YMSDGN TLGVMF SVRFDYNLY SNWWD VK 118
HmgII/1-177   60 I LPEFVFNQ KALLYSGR KDTG PVATGAVAAFA YMSDGN TLGVMF SVRFDYNLY SNWWD VK 120
HmT/1-177     60 I LPEFVFNQ KALLYSGR KDTG PVATGAVAAFA YMSDGN TLGVMF SVRFDYNLY SNWWD VK 120
Sti/1-176     59 I LPEVVPNT KALLYSGR KSSG PVATGAVAAFA YMSDGN TLGVMF SVRFDYNLY SNWWD VK 119
Avi/1-179     60 T LPYEVENSKALLYT ARKSKG PVARGAVGVLAY KMSDGN TLAVMFSV RFDYNLY SNWVN VK 120
PsTX-20A/1-179 60 T LPYEVENSKALLYT ARKSKG PVARGAVGVLAY KMSDGN TLAVMFSV RFDYNLY TNWVN VK 120
Avi/1-181     62 T LPYEVENSKALLYT ARKSKG PVARGAVGVLAY KMSDGN TLAVMFSV RFDYNLY TNWVN VK 122
Src/1-178     59 I LPHRVETGEALLYT ARKTKG PVATGAVGVFTYYL SDGN TLAVL FSVRFDYNLY SNWVN VK 119

EqII/1-179     121 I YKGRRRADQRM YEELYYNLS PFRGDNGWH TRN LG - YGLKSRGFMNS SSHA ILEI HVSKA 179
TonC/1-179     121 I YKGRRRADQRM YEELYYNLS PFRGDNGWH TRN LG - YGLKSRGFMNS SSHA ILEI HVSKA 179
FraC/1-179     121 I YKGRRRADQRM YEELYYNLS PFRGDNGWH SRGLG - YGLKSRGFMNS SSHA ILEI HVTKA 179
EqII/1-179     121 I YKGRRRADQRM YEELYYNLS PFRGDNGWH ERHLG - YGLKSRGFMNS SSHA ILEI HVTKA 179
EqII/1-179     121 V YKGRRRADQRM YEELYYNLS PFRGDNGWH NRDLG - YGLKSRGFMNS SSHA ILEI HVTKA 179
Bpl/1-179      121 T YSGMKRRADQSM YEDLYYHASP FKGDNGWH SRNLG - YGLKSRGFMNS SSHA ILEI HVSKA 179
Or-G/1-173     116 V YGRRRRRADQAMY EGLLYG - I PYGGDNGWH ARKLG - YGLKSRGFMNS SSHA ILEI HVTKA 173
Or-A/1-165     108 V YSGKRRADQGM SEDLSYG - NPYGGDNGWH ARKLA - YGLKERGFMS SSHA ILEI HATKA 165
Sti/1-175     119 I YSGKRRADQGM YEDLYYG - NPYRGDNGWH EKNLG - YGLRMKG I MTSAGEA KMOI KISR - 175
RTX-Sti/1-177 121 I YSGKRRADQAMY EDLYYG - NPYRGDNGWH QKNLG - YGLKMKG I MTSAGEA ILEI RISR - 177
RTX-A/1-175   119 V YSGKRRADQAMY EDLYYG - NPYRGDNGWH QKNLG - YGLKMKG I MTSAGEA ILEI RISR - 175
HmgII/1-177   121 V YSGKRRADQGM YEDLYYG - NPYRGDNGWH QKNLG - YGLRMKG I MTSAGEA ILOI RISR - 177
HmT/1-177     121 V YSGKRRADQGM YEDLYYG - NPYRGDNGWH QKNLG - YGLRMKG I MTSAGEA ILOI KISR - 177
Sti/1-176     120 I YPSKRRADQGM YEDLYYG - NPYRGDNGWH QKNLG - YGLRMKG I MTSAGEA KMOI KISR - 176
Avi/1-179     121 I YDGEKKAD EKMYN ELYNNNPI KP - STWEKRD LGK DGLKLRG FMT SNGDAKLV HI EKS 179
PsTX-20A/1-179 121 I YDGEKKAD EKMYN ELYNNNPI KP - SIWEKRD LGQDGLKLRG FMT SNGDAKLV HI EKS 179
Avi/1-181     123 I YDGEKKAD EKMYN ELYNNNPI KP - SIWEKRD LGQDGLKLRG FMT SNGDAKLV HI EKS 181
Src/1-178     120 I YSGKRNAD YDMYHE LYYDAN PFEEDDTWEYR YLG - YGMRMED YMS SSHA ILEI K I TVMPD 178

```

Figure S3: Actinoporin protein sequence alignments. Uniprot accession codes and sequence identities relative to EqII are detailed in the main text. Alignments were performed using the Clustal Omega webserver. The figure was created using Jalview 2.8.1 with highly conserved residue color-shaded according to conservation.

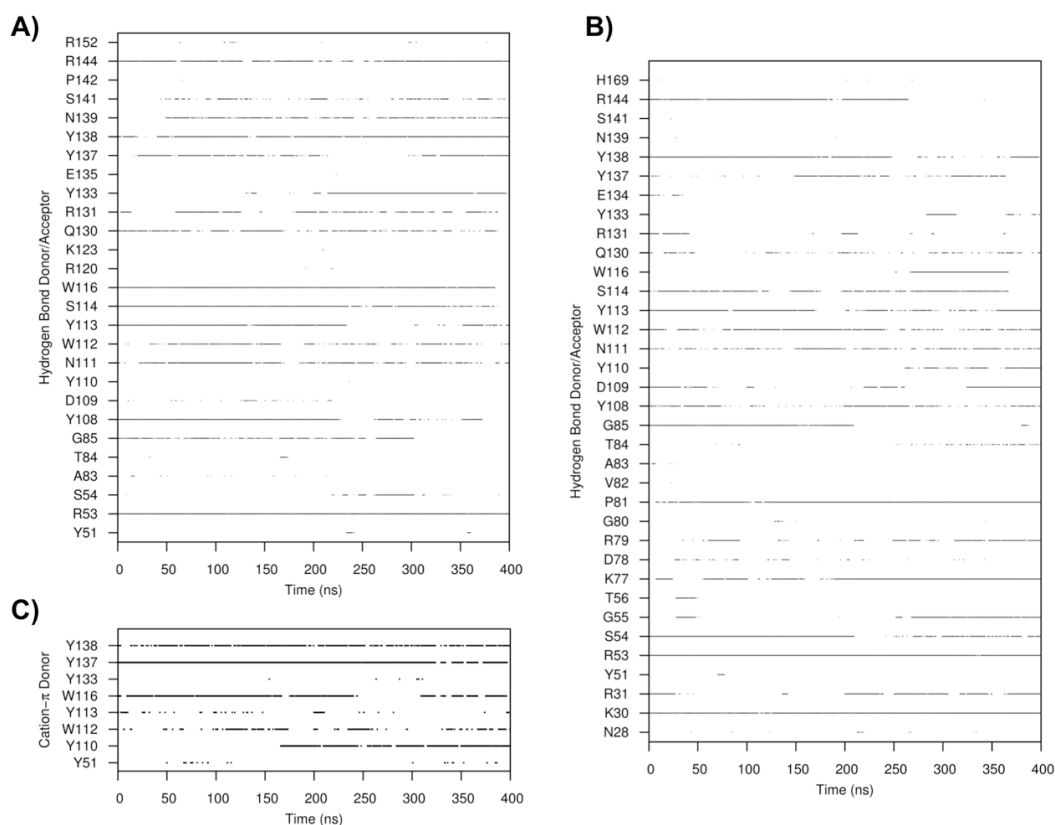

Figure S4: Per-residue time evolution profiles of H-bonds to (A) DPC, and (B) Ac-SM residues; and (C) cation- $\pi$  interactions to Ac-SM residues. Trajectories were analyzed over 40000 frames.

### Size estimates of DPC and Ac-SM

Dynamic light scattering measurements were made using a Malvern Zetasizer Nano ZS in 173° backscattering mode. Triplicate readings for Ac-SM were made at 2, 4, 8, 16, 64, 128  $\mu\text{M}$  in water. DPC was measured at 128 mM. All readings were made at 25 °C and analyses using manufacturer's software. The reported hydrodynamic radius of Ac-SM was averaged over all measurements over 4  $\mu\text{M}$ , where signal quality was adequate.

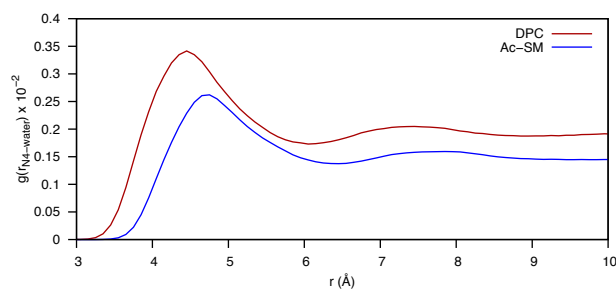

Figure S5: Radial pair distribution of water to the choline nitrogen of DPC and Ac-SM.
