# Supplementary material
Source: PubMed Central journal article supplement (PMC4407268)
Supplement: mmc2.pdf [file mmc2.pdf]

## Article

# Characterization of the Lipid-Binding Site of Equinatoxin II by NMR and Molecular Dynamics Simulation

Daniel K. Weber,<sup>1,2</sup> Shenggen Yao,<sup>2</sup> Nejc Rojko,<sup>3</sup> Gregor Anderluh,<sup>3</sup> Terry P. Lybrand,<sup>4</sup> Matthew T. Downton,<sup>5</sup> John Wagner,<sup>5</sup> and Frances Separovic<sup>1,2,\*</sup>

<sup>1</sup>School of Chemistry and <sup>2</sup>Bio21 Institute, University of Melbourne, Victoria, Australia; <sup>3</sup>Laboratory for Molecular Biology and Nanobiotechnology, National Institute of Chemistry, Ljubljana, Slovenia; <sup>4</sup>Center for Structural Biology, Department of Chemistry, Vanderbilt University, Nashville, Tennessee; and <sup>5</sup>IBM Research Collaboratory for Life Sciences, Victorian Life Sciences Computation Initiative, University of Melbourne, Victoria, Australia

**ABSTRACT** Equinatoxin II (EqII) is a soluble, 20 kDa pore-forming protein toxin isolated from the sea anemone *Actinia equina*. Although pore formation has long been known to occur in distinct stages, including monomeric attachment to phospholipid membranes followed by detachment of the N-terminal helical domain and oligomerization into the final pore assembly, atomistic-level detail of the protein-lipid interactions underlying these events remains elusive. Using high-resolution solution state NMR of uniformly-<sup>15</sup>N-labeled EqII at the critical micelle concentration of dodecylphosphocholine, we have mapped the lipid-binding site through chemical shift perturbations. Subsequent docking of an EqII monomer onto a dodecylphosphocholine micelle, followed by 400 ns of all-atom molecular dynamics simulation, saw several high-occupancy lipid-binding pockets stabilized by cation- $\pi$ , hydrogen bonding, and hydrophobic interactions; and stabilization of the loop housing the conserved arginine-glycine-aspartate motif. Additional simulation of EqII with an *N*-acetyl sphingomyelin micelle, for which high-resolution NMR data cannot be obtained due to aggregate formation, revealed that sphingomyelin specificity might occur via hydrogen bonding to the 3-OH and 2-NH groups unique to the ceramide backbone by side chains of D109 and Y113; and main chains of P81 and W112. Furthermore, a binding pocket formed by K30, K77, and P81, proximate to the hinge region of the N-terminal helix, was identified and may be implicated in triggering pore formation.

## INTRODUCTION

Equinatoxin II (EqII) is a soluble pore-forming toxin produced by the sea anemone *Actinia equina* (1). EqII belongs to actinoporins—a family of potent hemolytic proteins isolated from the venoms of sea anemones, found to have a high isoelectric point (>9), receptor-like affinity to sphingomyelin (SM), and a well-conserved  $\beta$ -sandwich core flanked by two  $\alpha$ -helical domains (2,3). Crystal and solution-state NMR structures have been solved for EqII (4,5) and homologous sticholysins StI and StII from *Stichodactyla helianthus* (6,7) and Fragaceatoxin FraC from *Actinia fragacea* (8). A crystal structure of a binary complex of StII and the phosphocholine (POC) headgroup moiety, common to SM and phosphatidylcholine (PC) lipids, suggested the lipid-binding site consisted of a conserved patch rich in solvent-exposed aromatic amino acids (7), which has since been corroborated by site-directed mutagenesis and solution NMR with vesicle, micelle, and bicelle systems (9–13). The lipid-binding site of actinoporins is essential for hemolytic activity and membrane permeation as attachment of monomeric species is required to initiate translocation of the N-terminus to the

hydrophobic interior of the membrane and oligomerization into a trimeric/tetrameric pore (14–19).

Although EqII maintains nM affinity to PC membrane models, affinity for SM is an order of magnitude greater and essential for lytic activity (9,20). Furthermore, the potency of actinoporins against SM has been described as a coadaptive trait, whereby sea anemones have evolved resistant phosphono analogs of SM that are either nonmethylated or monomethylated at the headgroup amino position to avert self-selectivity (21). SM selectivity of EqII and the interactions responsible have not been defined at atomic detail. Nor have they been for other pore-forming toxins such as lysenin, produced by the earthworm *Eisenia fetida* (22), and cholesterol-dependent hemolysins, listeriolysin O, and perfringolysin O from bacteria *Listeria monocytogenes* and *Clostridium perfringens*, respectively (23,24), that target eukaryotic membranes. This receptor-like specificity toward lipids has been exploited for probing SM and cholesterol-enriched domains in eukaryotic cell membranes (25–29).

Understanding lipid-specific interactions at atomic-level detail, however, is difficult to achieve by current experimental methods. Although x-ray structures collected for StII-POC and, more recently, POC-lysenin-SM complexes have shed some light (7,22), the lack of a surrounding

Submitted January 5, 2015, and accepted for publication March 12, 2015.

\*Correspondence: fs@unimelb.edu.au

Editor: Scott Feller.

© 2015 by the Biophysical Society  
0006-3495/15/04/1987/10 \$2.00

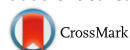

membrane environment remains a significant limitation. SM selectivity has been explored by chemical modification (methylation) of the ceramide backbone, unique to SM over PC lipids, and has implicated the 2-NH and 3-OH positions as essential for binding and membrane permeabilization of actinoporins (30). Furthermore, biophysical studies of several mutants of EqII and StII, particularly at (or equivalent to) W112 and Y113 positions, show considerable impact on lytic activity against SM-containing membranes (9,10,31), whereas  $^{19}\text{F}$  NMR studies identify W112 as important for SM selectivity (11).

Several NMR methods exist to derive essential information on protein interactions with model membrane systems (i.e., vesicles, micelles, bicelles, etc.), such as  $^{31}\text{P}$  solid-state experiments (32–34), diffusion measurements (35), nuclear Overhauser effects, paramagnetic relaxation enhancement (36), and chemical shift perturbations (CSPs) (11,13,37). However, a high degree of ambiguity in determining the specific nature of the interactions responsible for the observed effects often remains.

In this work, we have used CSP from solution NMR of uniformly  $^{15}\text{N}$ -labeled EqII in dodecylphosphocholine (DPC) micelles to map out the residues making up the interfacial lipid-binding site. With these data, we were able to perform all-atom molecular dynamics (MD) simulation of EqII docked to a characteristic DPC micelle model (38) to identify the specific interactions underlying general PC recognition. To understand the SM-dependence of actinoporin pore formation, the same docking mode was also tested with an *N*-acetyl sphingomyelin (Ac-SM) micelle, which could not be investigated by NMR because of formation of large aggregates, to identify additional interactions unique to the ceramide backbone.

## MATERIALS AND METHODS

### NMR spectroscopy

Uniformly  $^{15}\text{N}$ - and  $^{13}\text{C}^{15}\text{N}$ -labeled EqII was prepared from expressing the EqII gene in M9 minimal media supplemented with ISOGRO (Sigma-Aldrich, St. Louis, MO), purified and concentrated according to protocols reported previously (39), and then lyophilized for storage at  $-20^\circ\text{C}$ . Yields of 3.6 and 4.2 mg/L of growth medium were determined for  $^{15}\text{N}$  and  $^{13}\text{C}^{15}\text{N}$  protein, respectively. NMR samples were prepared to 10 mM sodium phosphate, 20 mM NaCl, 0.02%  $\text{NaN}_3$  in 90%  $\text{H}_2\text{O}/10\%$   $\text{D}_2\text{O}$  at pH 5.00; and protein concentration confirmed by 280 nm absorbance with an extinction coefficient of  $36,100\text{ M}^{-1}\text{ cm}^{-1}$  (40).  $^1\text{H}$ - $^{15}\text{N}$  heteronuclear single quantum correlation (HSQC) (41) spectra were recorded at  $30^\circ\text{C}$  on a 500 MHz Bruker Avance spectrometer (Rheinstetten, Germany) equipped with a cryoprobe. Data were processed with NMRPipe (42) and analyzed using CCPNmr Analysis (43). Chemical shifts were referenced to the Trp-116  $\text{He1-Ne1}$  crosspeak, found throughout our study to be unaffected by either pH or salt conditions, and compared to assignments deposited in the BioMagResBank database (44). Heavily shifted crosspeaks were confirmed by a 3D-HNCA spectrum (45). DPC stock (1 M in water) was titrated directly into the NMR tube and resulting selective shifts to  $^1\text{H}^{15}\text{N}$  crosspeaks were averaged according to the equation  $\Delta\delta_{\text{HN}} = ((\Delta\delta_{\text{H}}^2 + \alpha\Delta\delta_{\text{N}}^2)/2)^{1/2}$ , where  $\Delta\delta_{\text{H}}$  and  $\Delta\delta_{\text{N}}$  are the chemical shift changes induced

to the  $^1\text{H}$  and  $^{15}\text{N}$  dimensions, respectively, and  $\alpha$  is a weighting factor of 0.14 (37).

### MD parameters

Restrained electrostatic potentials for DPC atoms were taken directly from validated micelle models (38). All other bonded and nonbonded parameters were obtained from the general AMBER force field (GAFF) (46) except for acyl chain carbon and hydrogen, which were assigned revised Lennard-Jones and torsion parameters from the GAFFlipid force field (47). Charges for Ac-SM (18:1, 2:0) were derived by an analogous scheme as for DPC (Fig. S1 in the Supporting Material), using fragments ethylmethylphosphate and choline from geometry-optimized Protein Data Bank (PDB) structures from the F-92 project deposited in the R.E.D. database (38). 1-pentadecene and the ceramide-backbone fragment were geometry optimized at the Hartree-Fock level of theory with a 6-31G\* basis set using Gaussian09 (rev. C) as part of the R.E.D. web server (48) and starting structures in extended conformation. Charges and atom types assigned to DPC and Ac-SM are detailed in Tables S1 and S2.

### MD simulations

All simulations were run using NAMD 2.9 (49) scaled over 256 IBM Blue Gene/Q CPU cores (Rochester, MN). An initial 5000 steps of conjugate gradient minimization on all systems was performed and productions run using a 12 Å (first 220 ns) cutoff, or 9 Å (final 200 ns), with smoothing functions disabled for electrostatics and van der Waals terms. Long-range electrostatics were treated using the particle mesh Ewald method. The SETTLE algorithm was applied to water hydrogen atoms and the SHAKE algorithm applied to all other hydrogen atoms with a  $10^{-8}$  tolerance. For compatibility with the AMBER force field, 1–3 bonded interactions were ignored, 1–4 electrostatics were scaled by 0.83333333, and 1–4 van der Waals terms divided by 2. Temperature was maintained at 303.15 K using the Langevin thermostat with a  $5\text{ ps}^{-1}$  dampening coefficient and decoupled from hydrogen atoms. The Langevin piston Nosé-Hoover method was used to control pressure at 1.01325 bar using a 100 fs oscillation period and 50 fs dampening time. Electrostatics were evaluated in 2 fs time steps and remaining nonbonded interactions every 1 fs.

EqII(5-179) starting coordinates were taken from chain A of the crystal structure (PDB 1IAZ, 1.9 Å) (5). Solvent and sulfate ions were removed, and all histidines protonated at  $\text{Ne}$  positions. Docking onto an equilibrated DPC micelle structure of 54 molecules ( $\text{DPC}_{54}$ ) (38) was performed with rough guidance from NMR CSPs. AMBER99SB parameters (50) were assigned to all protein atoms and the system neutralized with seven chloride ions, and then solvated in a truncated octahedron of TIP3P water molecules (8 Å, first 220 ns; or 11 Å shell final 200 ns) using the LEAP program part of AmberTools12 software. Distance restraints ( $10\text{ kcal}\cdot\text{mol}^{-1}$ ) on atoms Y113  $\text{O}\eta$  to DPC P8 (4.40 Å); Y113  $\text{C}\gamma$  to DPC N4 (5.10 Å); Y113  $\text{C}\zeta$  to DPC N4 (4.76 Å); and Y138  $\text{O}\eta$  to DPC P8 (3.56 Å), measured from equivalent positions of the crystal structure of an StII-POC complex (PDB 1O72) (7), were applied to the nearest DPC for the initial 20 ns of simulation. Unrestrained production runs followed for 200 ns, and then periodic boundaries (water shells) and the cutoff for force evaluation were expanded and reduced, respectively, for a further 200 ns to minimize risks of periodic boundary artifacts. An identical approach was applied for docking to an equilibrated Ac-SM<sub>54</sub> micelle structure obtained from a 60 ns simulation. Further system details are outlined in Table S3.

MD trajectories were analyzed every 10 ps using VMD 1.9.1 (51) with scripts (available on request) capable of detecting contacts (including hydrophobic), H-bonds, and cation- $\pi$  complexes; and sorting by frame, residue (or other attribute), and pairwise association. Cation- $\pi$  interactions were analyzed between six-membered ring systems of Tyr, Trp, and Phe residues and the choline nitrogen cation of DPC and Ac-SM. All distances between ring carbons and the central nitrogen had to be within 7 Å, and all

distances measured within a 1.5 Å range to satisfy cation- $\pi$  criteria (52). H-bonds were defined by a D-H—A angle (donor atom, D; acceptor atom, A; and hydrogen, H)  $<20^\circ$ , and a D-A distance  $<3$  Å. Hydrophobic contacts were considered only for nonpolar protein and micelle atoms (i.e., atoms involved in C-H and S-H bonds) within 3 Å.

## RESULTS

### Refinement of the lipid-binding site by NMR with DPC

Micelle models, despite limitations such as high curvature, denaturing effects, and thinner hydrophobic region compared to membrane bilayers (53), are amenable for high-resolution NMR and are a convenient size for MD simulation. Solution NMR of uniformly  $^{15}\text{N}$ -labeled EqII with DPC was used to provide additional information on the lipid-binding site to details obtained from  $^{19}\text{F}$ -NMR (11) and site-directed mutagenesis experiments (9,31). DPC was titrated incrementally in 1.5 mM additions and perturbations of crosspeaks observed from  $^1\text{H}$ - $^{15}\text{N}$  HSQC spectra were used to identify lipid interactions along the entire backbone and some side-chain positions. The first titration point, at approximately the critical micelle concentration (CMC) of DPC ( $\sim 1.1$  mM) (54), provided the best signal, whereas considerable broadening was observed above CMC ( $^1\text{H}$ - $^{15}\text{N}$  HSQC spectra are depicted in Fig. S2). Line-broadened spectra have been problematic for previous 2D-NMR studies of EqII and StI with DPC (11,12), and may be the result of oligomerization.

Residues S54, G85, A87, D109, Y110, W112, Y113, W116, N118, Y138, and N139—consistent with the lipid-binding site—and distant regions surrounding V60 and H169, were perturbed at backbone amide positions upon titrating 1.5 mM DPC. Several unassigned perturbations were also observed in  $^1\text{H}$ - $^{15}\text{N}$  HSQC spectra, which may correspond to neighboring residues E135, L136, Y137, R161, N165, and E173. Downfield shifts observed for W116 H $\epsilon$  (+0.04 ppm) and N $\epsilon$  (+0.02 ppm) resonances are consistent with previous  $^{19}\text{F}$  NMR studies of EqII with 5- $^{19}\text{F}$ -labeled tryptophans, which suggested that the side chain of W116 was located at the polar interface of the DPC micelle (11).  $^{19}\text{F}$  CSPs to W112 also suggested the side chain to be embedded within the hydrophobic interior (11), and is supported by shifts to the H $\epsilon$ -N $\epsilon$  crosspeak reported for StI with dihexanoylphosphatidylcholine (DHPC) micelles (13), but not observed in our work. This discrepancy may reflect our use of DPC close to the CMC, where a relatively high concentration of free monomer will compete with fully formed micelles for EqII binding. In our experience and in reports of StI with DHPC, binding occurs with both monomeric and micellar forms, albeit greater NMR perturbations occur to more residues with DHPC present (13). Thus in our system, the perturbations represent a hybrid of the two scenarios for StI and maybe why nonspecific binding is more apparent at distal V60 and H169 positions.

### NMR-guided MD with a DPC micelle

Although perturbations obtained by NMR provide detailed mapping of residues affected at their backbone amide positions, ambiguity remains in knowing the exact interactions responsible for the perturbations. All-atom MD simulations were, therefore, used to derive explicit details of the dynamics, hydrogen bonds, cation- $\pi$  interactions, hydrophobic contacts, and penetration of the protein upon binding to a micelle model lipid environment. The initial configuration of the EqII-DPC<sub>54</sub> complex was chosen so that affected residues observed by NMR were located at the protein-micelle interface (Fig. 1 A), whereas restraints were applied over the initial 20 ns of equilibration to hold a POC headgroup in a

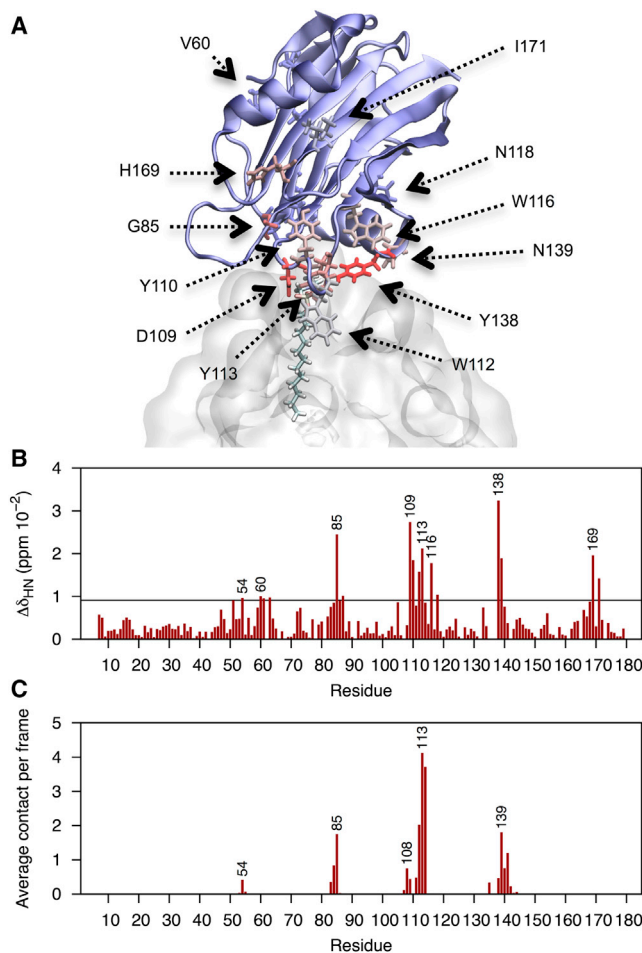

FIGURE 1 (A) Initial configuration of the EqII-DPC<sub>54</sub> complex before MD simulation. The single DPC molecule represented with bonds was restrained at the POC headgroup over the initial 20 ns of equilibration. Residues heavily affected in NMR experiments are represented in bonds and color-coded (blue-red) according to their CSPs. (B) Normalized perturbations for backbone  $^1\text{H}$ - $^{15}\text{N}$  crosspeaks in the presence of 1.5 mM DPC. Dashed line specifies significance where values are greater than the mean plus the standard deviation. Side-chain perturbations are not plotted. (C) Number of intermolecular contacts ( $<5$  Å) experienced between backbone nitrogen positions and heavy atoms of DPC over the last 200 ns of simulation. To see this figure in color, go online.

position consistent with the StII-POC crystal structure (7). The DPC micelle model and charge parameters chosen have been shown to accurately replicate experimentally known characteristics of the DPC micelle, including size and ellipsoidal shape, although the AMBER99SB force field was described to overestimate *trans* character of the acyl chains relative to the other force fields tested (38). In this work the GAFFlipid force field (47) reduced *trans* populations of acyl chains to 73.5% compared to GAFF (80.7%) and AMBER99SB (83.8%; 84.3% by Abel et al. (38)) (see Table S4 for further details).

Over 400 ns of unrestrained simulation, only a very minor change from the original docked position was observed for the EqtII-DPC<sub>54</sub> complex. Regions showing NMR effects correlated qualitatively well to intermolecular contacts experienced to the backbone nitrogen position during simulation (Fig. 1). The magnitudes, however, between these measurements varied noticeably, most likely from differential weighting of CSPs depending on the interactions responsible (i.e., side chain/backbone hydrogen bonding, hydrophobic interactions, structural transitions, etc.) (37) and/or micelle instability at the experimental concentration. Simulations identify that loops  $\beta$ 7– $\beta$ 8 (N111–Y113) and some residues of the  $\alpha$ 2 helix (E134, Y137–N139) are inserted into the micelle headgroup region (Fig. 2 A). The deep insertion of W112 into the nonpolar upper acyl region and polar interfacial location of W116 is also consistent with <sup>19</sup>F NMR shifts seen with DPC micelles (11).

Multiple binding pockets for DPC (based on occupancy) were identified in the conserved aromatic region. The longest-lived interaction was to the DPC that had restraints applied during the initial equilibration phase. The interaction persisted for the entire simulation and involved stable coordination of the choline by a cation- $\pi$  box formed between W116, Y137, and Y138 (or Y113) (Fig. 3). S114 and R144 additionally provided H-bonding to this site, but mostly participated in a more exchangeable interaction adjacent to W112. Hydrogen bonding from R53 and Y138, and loose cation- $\pi$  interactions from Y113, also created a high-occupancy DPC binding site (Fig. 3).

Y113 and W116 are completely conserved throughout the actinoporin family (Table 1), whereas natural variants of R53 (K), W112 (L, F), S114 (T), Y133 (S), Y138 (N), and R144 (K, E) are conservative for the dominant type of interaction provided. Conserved residues S54, G85, Y108 (F), and N111 also provided significant interactions, but were much less defined due to greater DPC exchange at peripheral zones.

### Simulations with an Ac-SM micelle

Ac-SM charge parameters were derived from an identical fragment-based approach used for DPC (38), which kept charges at the choline and phosphate atoms comparable between lipids. Because Ac-SM micelles have not received the

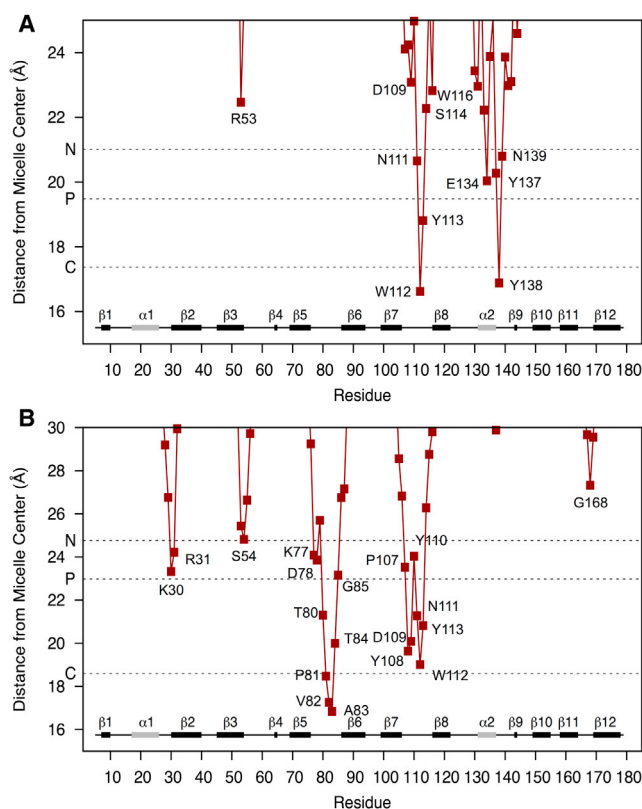

FIGURE 2 Average radii from the micelle center of mass measured for each protein residue over the final 200 ns of simulation with (A) DPC, and (B) Ac-SM micelle. Dashed lines indicate the average radii measured for all micelle nitrogen, phosphorous, and first acyl carbon atoms of the micelles. Secondary structure elements displayed at the bottom of each plot are labeled according to (5). To see this figure in color, go online.

same extensive experimental characterization as DPC, an aggregation number of 54 was also applied. Dynamic light scattering of Ac-SM in water detected particles consistent with micelles above 4  $\mu$ M. The hydrodynamic radius was estimated at  $35.7 \pm 3.3$  Å compared to  $25.6 \pm 0.3$  Å measured for DPC micelles. The hydrodynamic radius of the DPC micelle compared well to the simulated distance to the choline nitrogen atoms (Fig. 2 B) and the first hydration shell ( $25.4 \pm 0.7$  Å; see Fig. S5), although simulated Ac-SM radii ( $29.5 \pm 0.5$  Å) were noticeably lower than the dynamic light-scattering measurement. Consequently, the seemingly greater curvature in the Ac-SM simulation may expose the headgroups to greater hydration and stress the outermost regions of the lipid-binding site compared to that in an experimental system.

NMR chemical shifts of EqtII bound to an Ac-SM micelle could not be obtained due to suspected formation of large aggregates, which has been noted for StI with mixed micelles of 16C-lysoPC and lyso-SM (13). In addition, Ac-SM having a CMC of only several micromolar precluded titrations being performed at submicelle concentration (due to sensitivity limitations) where such aggregates would unlikely form—unlike DPC, which give workable spectra

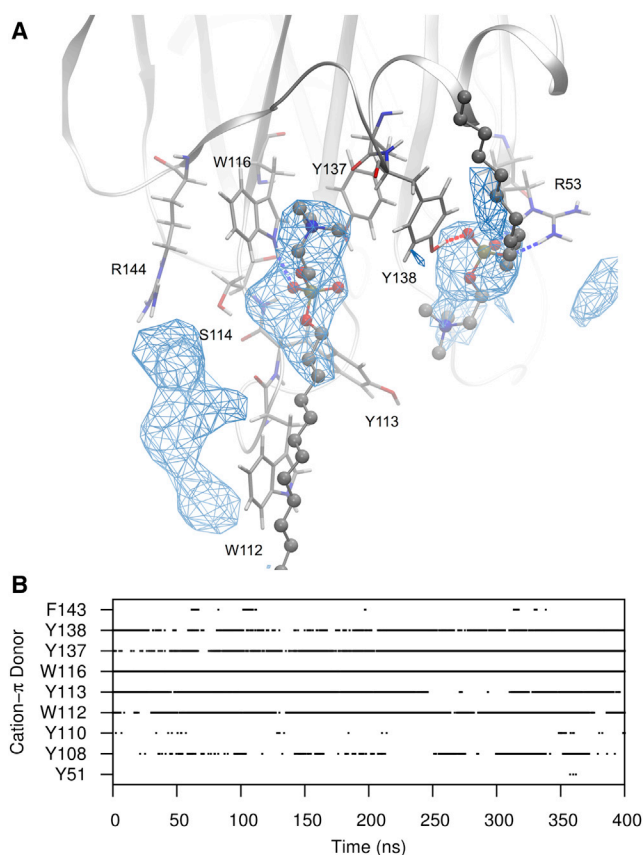

**FIGURE 3** (A) Representative snapshot of a DPC residue engaged in a long-timescale interaction by a cation- $\pi$  box formed by aromatic rings of W116, Y137, and Y138. A second DPC is also shown in a high-occupancy site formed from hydrogen bonding from R53 and Y138, with weak cation- $\pi$  association from Y113. Regions of high occupancy are represented in wireframe and calculated over the final 200 ns of simulation. (B) Time-evolution profiles of all EqII residues engaging cation- $\pi$  interactions with DPC residues. Fig. S4 includes time-evolution profiles for hydrogen bonds. To see this figure in color, go online.

up to 1.5 mM. The initial starting configuration for simulation of EqII with DPC was, therefore, used also for Ac-SM (Fig. 4 A). This binding mode, however, did not hold with the Ac-SM micelle. Interactions developed rapidly at the N-terminal hinge (K30, R31) with the insertion of loops  $\beta$ 3- $\beta$ 4 (S54) and  $\beta$ 5- $\beta$ 6 (K77 to G85) and slight detachment of the  $\alpha$ 2 helix (Fig. 2 B). As a consequence, cation- $\pi$  interactions were less prominent in the conserved aromatic region (Table 1; Fig S4 includes per-residue time-evolution profiles for H-bonds and cation- $\pi$  interactions). Two of several binding modes observed in the POC binding site are shown in Fig. 4, B and C, to highlight hydrogen bonding to the 3-OH ceramide position by W112 (main chain) and Y113. These were the only interactions in this region that could be considered as selective to unique functional groups of SM. Hydrophobic contribution from W112, and hydrogen bonding from the main chain, is consistent with natural leucine and phenylalanine mutations reported to have wild-type (WT) activity (9).

Interestingly, the longest-lived interaction for a single Ac-SM was at the hinge of the N-terminal helix, which persisted from ~20 to 400 ns of the simulation. Ac-SM was held in place by fluctuating hydrogen bonds from K30, K77, P81, and Y108. Ac-SM-selective H-bonding toward the 2-NH position occurred from the main-chain carbonyl of P81, whereas the other residues bound at nonunique phosphate and carbonyl positions. Cysteine mutations have identified by surface plasmon resonance, slightly reduced binding affinities (to 68–90% of WT) at R31, S54, and K77 positions, but disproportionate losses to lytic activity (to 6–8% of WT), which suggested that these residues might be involved in subsequent oligomerization and structural rearrangements of the N-terminus required for pore formation (31,56).

### Effects of binding on EqII structure and dynamics

Backbone root mean-square deviation values measured over the course of simulation fluctuated discretely between 0.9 and 1.6 Å over a long timescale (~100 ns), but showed no sign of any major restructuring (not shown). Although any significant changes would likely require significantly longer simulations to observe, based on past experimental (NMR, circular dichroism) work (6,11,12,57), they are unlikely to occur with highly curved micelle models. Large fluctuations in root mean-square deviation values coincided with periodic swinging of the unstructured N-terminal residues having the highest root mean-square fluctuation (RMSF) values (Fig. 5 A), and a rare, reversible, unwinding event of the upper  $\alpha$ 1 helix (residues 11 to 17) occurred at ~300 ns with DPC (Fig. 5 B). High RMSF values of N147, at the apex of loop  $\beta$ 9- $\beta$ 10, for EqII alone and with Ac-SM, are of interest due to the close proximity of the conserved R144-G145-D146 motif that has suggested roles in integrin binding (2) and/or oligomerization of sticholysin in solution (58). Large fluctuations occurred over long periods (once in 100 ns) in which loop  $\beta$ 9- $\beta$ 10 peeled from the protein (compare Fig. 5, B and C). Simultaneous separation of three transient long-range hydrogen bonds between residues N147-N165, G145-S166, S114-R144, and N147-S166 is required for the separation, whereas further modulation may occur from hydrogen bonding observed between N165-S167, D146-H150, D146-R144, and D146-G148. Only S114 and R144 had any direct interactions to micelle lipids, where contributions from R144 were much lower for the Ac-SM simulation due to the  $\alpha$ 2 helix slightly detaching from the micelle. Disproportionate reduction in lytic activity (93% compared to only 20% loss in binding affinity) previously described for a S114C mutant is consistent with roles beyond membrane binding (i.e., oligomerization), whereas R144C mutation resulted in ~40% loss in both activity and binding (31). Furthermore, equivalent

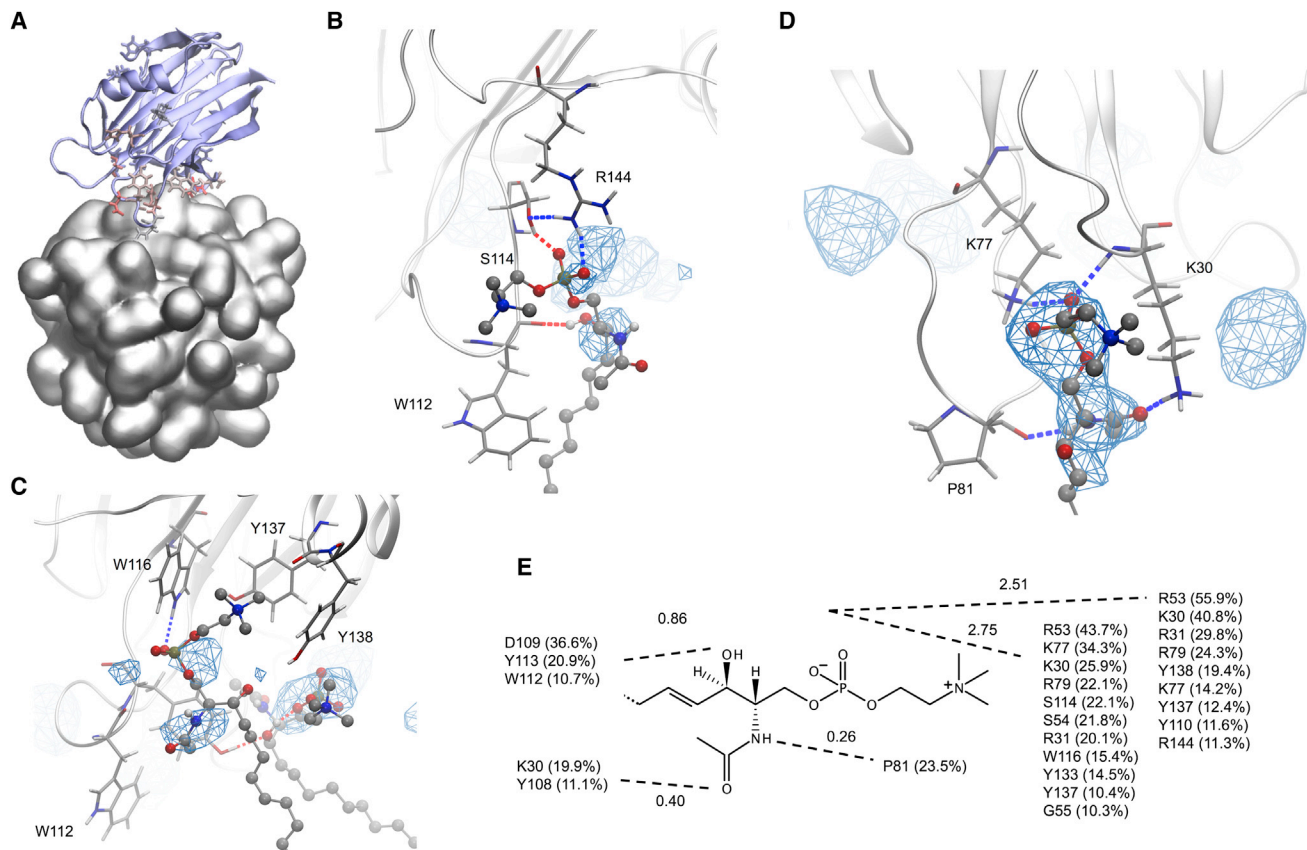

FIGURE 4 (A) Starting configuration for EqtII bound to an Ac-SM micelle. (B) Ac-SM bound specifically at 3-OH by the main chain of W112 and supported by additional hydrogen bonding from R144 and S114. (C) An Ac-SM bound weakly by cation- $\pi$  interactions to W116, Y137, and Y138, and hydrogen bonding to W116. An adjacent Ac-SM is bound at the 3-OH by the hydroxyl of Y113. (D) Representative snapshot of Ac-SM bound by hydrogen bonds from K30 (*main chain* and *side chain*), K77, and P81 (*main chain*). Sites of high occupancy were also observed from hydrogen bonding to S54 and G85 (*left zone*), and to K30, Y108, and D109 (*right zone*). (E) Total occupancy of hydrogen bonding (*side chain*, *main chain*, *donor*, and *acceptor*) provided by EqtII residues for polar groups of Ac-SM (values above dashed lines are the average number of hydrogen bonds per frame to the polar positions). Values were calculated over the last 200 ns of simulation and shown only if >10%. To see this figure in color, go online.

G145A mutation of StII severely reduces activity and alters oligomerization behavior (58).

## DISCUSSION

A combination of NMR and MD simulation was used to define interactions of EqtII with DPC in atomistic detail. NMR CSPs of backbone residues provided simple but effective means of mapping the lipid-binding site, whereas DPC micelles were a conveniently small system for direct comparison with all-atom simulation. Several perturbations to a conserved patch of aromatic amino acids on two solvent-exposed loops and the  $\alpha 2$  helix were consistent with the POC binding site seen in an x-ray structure of StII from *S. helianthus* (7). Mutagenesis (9–11,31), tryptophan fluorescence (59), and NMR (11–13) studies of EqtII and StI, have also provided evidence that this site is responsible for general affinity toward lipids with POC headgroups. In this work, 400 ns of MD simulation identified that coordination of the trimethylammonium group of POC within a

cation- $\pi$  box (60), formed by the aromatic rings of Y113, W116, Y137, and Y138, constituted the primary interaction with DPC. Cooperation from nearby hydrogen bond donors (S114 and R144) also contributed to a chelation effect that led to a central DPC occupying this region for the entire simulation. A high occupancy for DPC bridging S114 and R144 (depicted in Fig. 3 A) may offer an enhanced long-range interaction to stabilize loop  $\beta 9$ - $\beta 10$  or, perhaps, hydrogen bonding of R144 directly to S114 and D146 may destabilize the region to prevent significant oligomerization before membrane attachment.

Cation- $\pi$  box motifs have recently been described as mediating PC affinity of phosphatidylinositol-specific phospholipase C from *Bacillus thuringiensis* (52,60). Furthermore, cation- $\pi$  interactions may explain why a conserved P-[WYF]-D in zebrafish actinoporin-like protein is responsible for PC-binding properties (61). Residues involved in DPC binding are conserved among actinoporins, although Y137L/S variations in OrA and OrG actinoporins from *Oulactis orientalis* are notable exceptions. OrA and OrG

**TABLE 1** Conservation and summary of intermolecular interactions of EqII residues with DPC and Ac-SM micelles over the final 200 ns of MD simulation

|      | H-bonds ( $10^2$ frame $^{-1}$ ) <sup>a</sup> |           | Hydrophobic (frame $^{-1}$ ) <sup>b</sup> |       | Cation- $\pi$ (%) <sup>c</sup> |       | Natural Variants <sup>d</sup>                                            |
|------|-----------------------------------------------|-----------|-------------------------------------------|-------|--------------------------------|-------|--------------------------------------------------------------------------|
|      | DPC                                           | Ac-SM     | DPC                                       | Ac-SM | DPC                            | Ac-SM |                                                                          |
| V29  |                                               |           |                                           | 1.9   |                                |       | <b>I</b> (4,5,15–18)                                                     |
| K30  |                                               | 42, 49(b) |                                           | 3.9   |                                |       | <b>S</b> (4,5,7–14,18); <b>N</b> (6); <b>D</b> (15–17)                   |
| R31  |                                               | 50        |                                           |       |                                |       |                                                                          |
| R53  | 60                                            | 102       | 1.4                                       | 1.2   |                                |       | <b>K</b> (15–17)                                                         |
| S54  | 19                                            | 28        | 0.9                                       | 1.6   |                                |       |                                                                          |
| G55  |                                               | 20(b)     |                                           |       |                                |       |                                                                          |
| K77  |                                               | 49        |                                           |       |                                |       |                                                                          |
| R79  |                                               | 47        |                                           |       |                                |       | <b>T</b> (7–10,12,13); <b>S</b> (14); <b>K</b> (15–18)                   |
| P81  |                                               | 24(b)     |                                           | 11.5  |                                |       |                                                                          |
| V82  |                                               |           | 1.4                                       | 11.6  |                                |       | <b>D</b> (11)                                                            |
| A83  |                                               |           | 0.8                                       | 8.3   |                                |       | <b>T</b> (11)                                                            |
| T84  |                                               | 5         | 2.6                                       | 4.2   |                                |       | <b>R</b> (15–17)                                                         |
| G85  | 14(b)                                         | 2         |                                           |       |                                |       |                                                                          |
| V87  |                                               |           | 0.8                                       | 1.7   |                                |       |                                                                          |
| P107 |                                               |           | 0.3                                       | 1.1   |                                |       |                                                                          |
| Y108 | 18, 6(b)                                      | 19        | 3.7                                       | 4.4   | 28                             |       | <b>F</b> (5,7,9–18)                                                      |
| D109 |                                               | 37        | 0.4                                       | 2.9   |                                |       |                                                                          |
| Y110 |                                               | 15, 2(b)  | 1.5                                       | 3.1   | 1                              | 42    |                                                                          |
| N111 | 27                                            | 15        | 0.4                                       | 1.5   |                                |       |                                                                          |
| W112 | 6                                             | 8, 10(b)  | 24.9                                      | 17.5  | 42                             | 7     | <b>L</b> (5–8,10,11,15–17); <b>F</b> (12,13,18)                          |
| Y113 | 24                                            | 25        | 8.3                                       | 8.5   | 27                             | 4     |                                                                          |
| S114 | 15, 5(b)                                      | 13, 10(b) |                                           |       |                                |       | <b>T</b> (16,17)                                                         |
| W116 | 32                                            | 19        | 7.3                                       | 2.4   | 86                             | 14    |                                                                          |
| Q130 | 11                                            | 4         |                                           |       |                                |       | <b>E</b> (15–17); <b>Y</b> (18)                                          |
| R131 | 22                                            | 6         |                                           |       |                                |       | <b>S</b> (6); <b>A</b> (7,10,11); <b>G</b> (8,9,12–14); <b>K</b> (15–17) |
| Y133 | 63                                            | 15        |                                           |       |                                |       | <b>S</b> (8)                                                             |
| E134 |                                               |           | 2.4                                       | 0.1   |                                |       | <b>N</b> (15–17)                                                         |
| Y137 | 27                                            | 23        | 5.9                                       | 2.6   | 81                             | 60    | <b>L</b> (7); <b>S</b> (8)                                               |
| Y138 | 58                                            | 30        | 12.9                                      | 2.2   | 17                             | 22    | <b>N</b> (15–17)                                                         |
| N139 | 15                                            |           | 2.6                                       |       |                                |       | <b>H</b> (3,6); <b>Y</b> (4); <b>G</b> (7–10,12–14); <b>D</b> (18)       |
| S141 | 17, 1(b)                                      |           |                                           |       |                                |       | <b>I</b> (7); <b>N</b> (8–18)                                            |
| P142 |                                               |           | 5.6                                       | 1.5   |                                |       |                                                                          |
| R144 | 50                                            | 18        |                                           |       |                                |       | <b>K</b> (6,15–17); <b>G</b> (7,8); <b>E</b> (18)                        |

<sup>a</sup>Displayed if total H-bonds per frame >5 in either simulation and not zero. Hydrogen bonds involving backbone atoms are specified by (b).

<sup>b</sup>Displayed if >1 in either simulation and not zero.

<sup>c</sup>Displayed if >5 in either simulation and not zero.

<sup>d</sup>Actinoporins are indexed in parentheses according to sequence identity to EqII (1, 100.0%, *P61914*). Indices (*bold*), sequence identity and UniProt accession ID (*italics*) for each protein are as follows: TenC (2, 100.0%, *P61915*), FraC (3, 89.9%, *B9W5G6*), EqIV (4, 87.2%, *Q9Y1U9*), EqV (5, 82.1%, *Q93109*), BpI (6, 74.3%, *C5NSL2*), OrG (7, 72.3%, *Q5I2B1*), OrA (8, 70.9%, *Q5I4B8*), StII (9, 67.4%, *P07845*), RTX-SII (10, 67.2%, *P0C1F8*), RTX-A (11, 66.9%, *P58691*), HmgIII (12, 66.7%, *Q9U6X1*), HmT (13, 65.5% (55)), StI (14, 65.3%, *P81662*), AvtI (15, 61.2%, *Q5R231*), PsTX-20A (16, 60.7%, *Q8IAE2*), AvtII (17, 60.7%, *D2YZQ3*), and SrcI (18, 60.7%, *Q86FQ0*). Propeptide sequences were manually removed from sequences and alignments performed using the Clustal Omega web server. Sequence alignments included in Fig. S3.

are ~100-fold less hemolytic (against mammalian erythrocytes) than other actinoporins (62), which may be attributed partly to the loss of Y137 involvement in the cation- $\pi$  box (>80% occupancy). Furthermore, anchorage of W112 into the acyl region of the micelle correlates with <sup>19</sup>F-NMR data of EqII with DPC micelles (11). W112 is commonly substituted for L and F among actinoporins. According to the Wimley-White hydrophobicity scale, these residues are the next best candidates for being located in acyl environments based on water-octanol transfer free energies (63). The lower hydrophobicity of these variants may be compensated by commonly coinciding Y108F substitutions, which may reorient the protein slightly and possibly explain why StI has greater relative perturbation for loop  $\beta$ 5- $\beta$ 6 (13).

SM selectivity has long been assumed to occur at the POC binding site based on nonselectivity of W112A and Y113A mutants (9), and SM-induced perturbation to W112 observed by <sup>19</sup>F-NMR (11). SM differs from PC by the 2-NH and 3-OH groups on its ceramide backbone. Molecular modeling studies of a single SM docked at the POC binding site of StII proposed that the phenolic hydroxyl of Y137 (EqII numbering) might selectively H-bond these positions (30). In this work, MD provided the capability of more accurately representing the water-lipid interface and exploring multiple binding sites. Furthermore, MD could more effectively equilibrate to an optimal binding configuration, which was particularly important because NMR was unable to obtain experimental guidance for initial setup. Instead, by

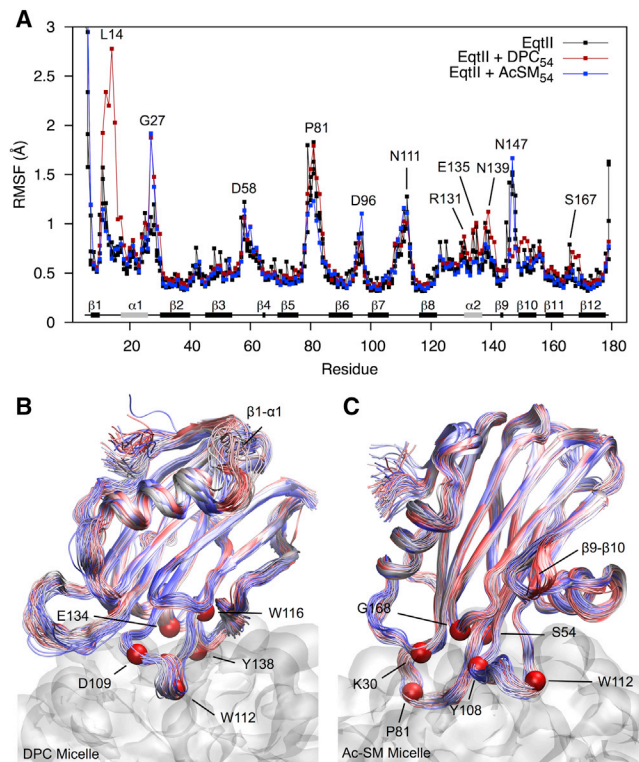

**FIGURE 5** (A) RMSF profile calculated at  $\alpha$  positions of EqtII alone (100 ns) and bound to micelles (last 200 ns). Overlay of backbone structures taken every 2 ns over the last 200 ns of simulation with DPC (B) and Ac-SM (C) micelles. Structures are color scaled according to simulation time (blue-red). Deeply inserted residues (local minima of Fig. 2) are identified by space-filled  $\alpha$  positions. To see this figure in color, go online.

applying the same starting configuration used for the DPC micelle, simulations predicted that D109, W112 (main chain), and Y113 were the only residues in proximity to the POC site to H-bond the 3-OH of SM. Although consistent with lack of SM selectivity for W112A and Y113A mutants (9), and  $^{19}\text{F}$  NMR perturbations to W112 (11), long-timescale binding to Ac-SM was not observed in this region. Furthermore, H-bonding from Y113 does not explain why phenylalanine mutations maintain WT activity (9), considering that MD simulation indicated cation- $\pi$  interactions as less important for binding to the Ac-SM micelle. Alternatively, W112 and Y113 may play a role in interfacial positioning, which would explain the conservative nature of the Y113F mutation (9) given that tyrosine and phenylalanine provide almost equally favorable transfer free energies to the PC-membrane interface (63).

Interactions toward Ac-SM occurred at the hinge of the  $\alpha$ 1 helix via H-bonds from K30, K77, and P81. K77 is entirely conserved in actinoporins and is essential for proper oligomerization (56). P81 is also completely conserved, perhaps for maintaining structure of the loop  $\beta$ 5- $\beta$ 6, but K30 can vary between serine, asparagine and aspartic acid. Serine and asparagine are conservative variants for H-bond donation to the carbonyl of Ac-SM. K30D variants

(AvtI, PsTX-20A, and AvtII), however, may instead act as a H-bond acceptor to the 3-OH. The location of this binding site at the hinge of the N-terminal helix is intriguing based on well-documented structural rearrangements required for pore lytic activity (14–19,40,57,59), and is consistent with a tightly bound lipid, assigned to be SM, recently identified in a crystallized pore of FraC (64). The lipid was noted to stabilize the pore by bridging adjacent protein chains (64) but our data also imply that binding may occur as early as the monomeric-binding phase of pore formation. Direct interaction to the N-terminal hinge, or reorientation to bring loops  $\beta$ 3- $\beta$ 4 and  $\beta$ 5- $\beta$ 6 to the membrane interface, might trigger the conformational changes necessary for pore formation. However, these would not be observed during simulation due to the long timescales required (~seconds (16)) and is not expected for highly curved model systems (6,11,12,57).

## CONCLUSIONS

NMR studies of backbone dynamics of StI with DHPC micelles revealed increased dynamics over the ps-ns timescale in loops  $\alpha$ 1- $\beta$ 2 and  $\beta$ 5- $\beta$ 6 (EqII nomenclature), whereas loops  $\beta$ 7- $\beta$ 8 and  $\alpha$ 2- $\beta$ 9 displayed conformational exchange in the ms- $\mu$ s regime (13). MD of EqtII with DPC did not suggest similar behavior based on backbone RMSF calculations, although such dynamics would reflect roughly the lipid-protein exchange rate occurring in these regions. Changes in backbone dynamics were, however, observed at the conserved R144-G145-D146 motif, which is suggested to play a part in oligomerization in solution (58) and integrin binding (2). The direct involvement of R144 in DPC binding suppressed periodic detachment of loop  $\beta$ 9- $\beta$ 10 (at N147) from the  $\beta$ -sandwich core, whereas the motion was reintroduced with Ac-SM due to R144 having reduced roles in binding. The implications of the dynamics observed for loop  $\beta$ 9- $\beta$ 10, and its variability between DPC and Ac-SM, is difficult to assess with limited experimental data available. For mixed lipid systems PC could possibly bind in this region while Ac-SM is attached to the N-terminal hinge. However, the slow exchange of some lipids precluded testing by MD simulations, but may explain why phase-boundaries between liquid-disordered PC and liquid-ordered SM or SM/cholesterol phases promote EqtII activity in model systems (16,65–67).

## SUPPORTING MATERIAL

Five figures and four tables are available at [http://www.biophysj.org/biophysj/supplemental/S0006-3495\(15\)00285-4](http://www.biophysj.org/biophysj/supplemental/S0006-3495(15)00285-4).

## AUTHOR CONTRIBUTIONS

D.K.W.: experimental design, acquisition, analysis and interpretation of data, drafting of manuscript; S.Y.: acquisition, analysis and interpretation of NMR data, critical revision; N.R.: protein expression and labeling,



analysis and functional study; G.A.: contributed analytic tool, interpretation of data, critical revision; T.P.L., M.T.D., and J.W.: design and analysis of MD study, critical revision; F.S.: study conception and design, interpretation of data, writing sections and critical revision.

## ACKNOWLEDGMENTS

This work was supported by a University of Melbourne Dyason – Vanderbilt Partnership grant, VLSCI Resource Allocation Scheme and grants from the Slovenian Research Agency. D.W. is a recipient of an Australian Postgraduate Award and a Dowd Foundation Postgraduate Research Scholarship.

## REFERENCES

1. Ferlan, I., and D. Lebez. 1974. Equinatoxin, a lethal protein from *Actinia equina*—I. Purification and characterization. *Toxicon*. 12:57–61.
2. Anderlüh, G., and P. Maček. 2002. Cytolytic peptide and protein toxins from sea anemones (Anthozoa: Actiniaria). *Toxicon*. 40:111–124.
3. Kristan, K. C., G. Viero, ..., G. Anderlüh. 2009. Molecular mechanism of pore formation by actinoporins. *Toxicon*. 54:1125–1134.
4. Hinds, M. G., W. Zhang, ..., R. S. Norton. 2002. Solution structure of the eukaryotic pore-forming cytolysin equinatoxin II: implications for pore formation. *J. Mol. Biol.* 315:1219–1229.
5. Athanasiadis, A., G. Anderlüh, ..., D. Turk. 2001. Crystal structure of the soluble form of equinatoxin II, a pore-forming toxin from the sea anemone *Actinia equina*. *Structure*. 9:341–346.
6. García-Linares, S., I. Castrillo, ..., J. G. Gavilanes. 2013. Three-dimensional structure of the actinoporin sticholysin I. Influence of long-distance effects on protein function. *Arch. Biochem. Biophys.* 532:39–45.
7. Mancheño, J. M., J. Martín-Benito, ..., J. A. Hermoso. 2003. Crystal and electron microscopy structures of sticholysin II actinoporin reveal insights into the mechanism of membrane pore formation. *Structure*. 11:1319–1328.
8. Mechaly, A. E., A. Bellomio, ..., D. M. A. Guérin. 2011. Structural insights into the oligomerization and architecture of eukaryotic membrane pore-forming toxins. *Structure*. 19:181–191.
9. Bakrač, B., I. Gutiérrez-Aguirre, ..., G. Anderlüh. 2008. Molecular determinants of sphingomyelin specificity of a eukaryotic pore-forming toxin. *J. Biol. Chem.* 283:18665–18677.
10. Alegre-Cebollada, J., M. Cunietti, ..., A. Martínez-del-Pozo. 2008. Calorimetric scrutiny of lipid binding by sticholysin II toxin mutants. *J. Mol. Biol.* 382:920–930.
11. Anderlüh, G., A. Razpotnik, ..., R. S. Norton. 2005. Interaction of the eukaryotic pore-forming cytolysin equinatoxin II with model membranes: 19F NMR studies. *J. Mol. Biol.* 347:27–39.
12. Castrillo, I., N. A. Araujo, ..., M. Bruix. 2010. Specific interactions of sticholysin I with model membranes: an NMR study. *Proteins*. 78:1959–1970.
13. López-Castilla, A., F. Pazos, ..., J. R. Pires. 2014. Solution NMR analysis of the interaction between the actinoporin sticholysin I and DHPC micelles—correlation with backbone dynamics. *Proteins*. 82:1022–1034.
14. Hong, Q., I. Gutiérrez-Aguirre, ..., G. Anderlüh. 2002. Two-step membrane binding by Equinatoxin II, a pore-forming toxin from the sea anemone, involves an exposed aromatic cluster and a flexible helix. *J. Biol. Chem.* 277:41916–41924.
15. Kristan, K., Z. Podlesek, ..., G. Anderlüh. 2004. Pore formation by equinatoxin, a eukaryotic pore-forming toxin, requires a flexible N-terminal region and a stable  $\beta$ -sandwich. *J. Biol. Chem.* 279:46509–46517.
16. Rojko, N., K. C. Kristan, ..., G. Anderlüh. 2013. Membrane damage by an  $\alpha$ -helical pore-forming protein, Equinatoxin II, proceeds through a succession of ordered steps. *J. Biol. Chem.* 288:23704–23715.
17. Gutiérrez-Aguirre, I., A. Barlič, ..., J. M. González-Mañas. 2004. Membrane insertion of the N-terminal  $\alpha$ -helix of equinatoxin II, a sea anemone cytolytic toxin. *Biochem. J.* 384:421–428.
18. Malovrh, P., G. Viero, ..., G. Anderlüh. 2003. A novel mechanism of pore formation: membrane penetration by the N-terminal amphipathic region of equinatoxin. *J. Biol. Chem.* 278:22678–22685.
19. Kristan, K., G. Viero, ..., G. Anderlüh. 2007. The equinatoxin N-terminus is transferred across planar lipid membranes and helps to stabilize the transmembrane pore. *FEBS J.* 274:539–550.
20. Belmonte, G., C. Pederzoli, ..., G. Menestrina. 1993. Pore formation by the sea anemone cytolysin equinatoxin II in red blood cells and model lipid membranes. *J. Membr. Biol.* 131:11–22.
21. Meinardi, E., M. Florin-Christensen, ..., J. Florin-Christensen. 1995. The molecular basis of the self/nonself selectivity of a coelenterate toxin. *Biochem. Biophys. Res. Commun.* 216:348–354.
22. De Colibus, L., A. F. P. Sonnen, ..., R. J. C. Gilbert. 2012. Structures of lysenin reveal a shared evolutionary origin for pore-forming proteins and its mode of sphingomyelin recognition. *Structure*. 20:1498–1507.
23. Anderlüh, G., and J. H. Lakey. 2008. Disparate proteins use similar architectures to damage membranes. *Trends Biochem. Sci.* 33:482–490.
24. Bavdek, A., R. Kostanjšek, ..., G. Anderlüh. 2012. pH dependence of listeriolysin O aggregation and pore-forming ability. *FEBS J.* 279:126–141.
25. Yachi, R., Y. Uchida, ..., H. Arai. 2012. Subcellular localization of sphingomyelin revealed by two toxin-based probes in mammalian cells. *Genes Cells*. 17:720–727.
26. Garcia, P. S., G. Chieppa, ..., S. Rufini. 2012. Sticholysin II: a pore-forming toxin as a probe to recognize sphingomyelin in artificial and cellular membranes. *Toxicon*. 60:724–733.
27. Bakrač, B., A. Kladnik, ..., G. Anderlüh. 2010. A toxin-based probe reveals cytoplasmic exposure of Golgi sphingomyelin. *J. Biol. Chem.* 285:22186–22195.
28. Abe, M., and T. Kobayashi. 2014. Imaging local sphingomyelin-rich domains in the plasma membrane using specific probes and advanced microscopy. *Biochim. Biophys. Acta*. 1841:720–726.
29. Ohno-Iwashita, Y., Y. Shimada, ..., S. Iwashita. 2004. Perfringolysin O, a cholesterol-binding cytolysin, as a probe for lipid rafts. *Anaerobe*. 10:125–134.
30. Maula, T., Y. J. E. Isaksson, ..., J. P. Slotte. 2013. 2NH and 3OH are crucial structural requirements in sphingomyelin for sticholysin II binding and pore formation in bilayer membranes. *Biochim. Biophys. Acta*. 1828:1390–1395.
31. Anderlüh, G., A. Barlič, ..., G. Menestrina. 1999. Cysteine-scanning mutagenesis of an eukaryotic pore-forming toxin from sea anemone: topology in lipid membranes. *Eur. J. Biochem.* 263:128–136.
32. Roberts, M. F., and A. G. Redfield. 2004. Phospholipid bilayer surface configuration probed quantitatively by  $(31)\text{P}$  field-cycling NMR. *Proc. Natl. Acad. Sci. USA*. 101:17066–17071.
33. Sani, M. A., D. K. Weber, ..., J. D. Gehman. 2013. A practical implementation of de-Pake-ing via weighted Fourier transformation. *PeerJ*. 1:e30.
34. Sani, M. A., F. Separovic, and J. D. Gehman. 2011. Disentanglement of heterogeneous dynamics in mixed lipid systems. *Biophys. J.* 100:L40–L42.
35. Yao, S., D. K. Weber, ..., D. W. Keizer. 2014. Measuring translational diffusion coefficients of peptides and proteins by PFG-NMR using band-selective RF pulses. *Eur. Biophys. J.* 43:331–339.
36. Papavoine, C. H. M., R. N. H. Konings, ..., F. J. M. van de Ven. 1994. Location of M13 coat protein in sodium dodecyl sulfate micelles as determined by NMR. *Biochemistry*. 33:12990–12997.
37. Williamson, M. P. 2013. Using chemical shift perturbation to characterize ligand binding. *Prog. Nucl. Magn. Reson. Spectrosc.* 73:1–16.
38. Abel, S., F. Y. Dupradeau, and M. Marchi. 2012. Molecular dynamics simulations of a characteristic DPC micelle in water. *J. Chem. Theory Comput.* 8:4610–4623.

39. Anderluh, G., J. Pungercar, ..., F. Gubenšek. 1996. Cloning, sequencing, and expression of equinatoxin II. *Biochem. Biophys. Res. Commun.* 220:437–442.
40. Anderluh, G., J. Pungercar, ..., P. Macek. 1997. N-terminal truncation mutagenesis of equinatoxin II, a pore-forming protein from the sea anemone *Actinia equina*. *Protein Eng.* 10:751–755.
41. Palmer, III, A. G., J. Cavanagh, ..., M. Rance. 1991. Sensitivity improvement in proton-detected two-dimensional heteronuclear correlation NMR spectroscopy. *J. Magn. Reson.* 93:151–170.
42. Delaglio, F., S. Grzesiek, ..., A. Bax. 1995. NMRPipe: a multidimensional spectral processing system based on UNIX pipes. *J. Biomol. NMR.* 6:277–293.
43. Vranken, W. F., W. Boucher, ..., E. D. Laue. 2005. The CCPN data model for NMR spectroscopy: development of a software pipeline. *Proteins.* 59:687–696.
44. Zhang, W., M. G. Hinds, ..., R. S. Norton. 2000. Letter to the editor: Sequence-specific resonance assignments of the potent cytolytic equinatoxin II. *J. Biomol. NMR.* 18:281–282.
45. Grzesiek, S., and A. Bax. 1992. Improved 3D triple-resonance NMR techniques applied to a 31 kDa protein. *J. Magn. Reson.* 96:432–440.
46. Wang, J., R. M. Wolf, ..., D. A. Case. 2004. Development and testing of a general amber force field. *J. Comput. Chem.* 25:1157–1174.
47. Dickson, C. J., L. Rosso, ..., I. R. Gould. 2012. GAFFlipid: a general amber force field for the accurate molecular dynamics simulation of phospholipid. *Soft Matter.* 8:9617–9627.
48. Vanquelf, E., S. Simon, ..., F. Y. Dupradeau. 2011. R.E.D. Server: a web service for deriving RESP and ESP charges and building force field libraries for new molecules and molecular fragments. *Nucleic Acids Res.* 39:W511–W517.
49. Phillips, J. C., R. Braun, ..., K. Schulten. 2005. Scalable molecular dynamics with NAMD. *J. Comput. Chem.* 26:1781–1802.
50. Hornak, V., R. Abel, ..., C. Simmerling. 2006. Comparison of multiple Amber force fields and development of improved protein backbone parameters. *Proteins.* 65:712–725.
51. Humphrey, W., A. Dalke, and K. Schulten. 1996. VMD: visual molecular dynamics. *J. Mol. Graph.* 14:33–38, 27–28.
52. Grauffel, C., B. Yang, ..., N. Reuter. 2013. Cation- $\pi$  interactions as lipid-specific anchors for phosphatidylinositol-specific phospholipase C. *J. Am. Chem. Soc.* 135:5740–5750.
53. Warschawski, D. E., A. A. Arnold, ..., I. Marcotte. 2011. Choosing membrane mimetics for NMR structural studies of transmembrane proteins. *Biomembranes.* 1808:1957–1974.
54. Stafford, R. E., T. Fanni, and E. A. Dennis. 1989. Interfacial properties and critical micelle concentration of lysophospholipids. *Biochemistry.* 28:5113–5120.
55. Samejima, Y., M. Yanagisawa, ..., D. Mebs. 2000. Amino acid sequence studies on cytolytic toxins from sea anemone *Heteractis magnifica*, *Entacmaea quadricolor* and *Stichodactyla mertensii* (Anthozoa). *Toxicon.* 38:259–264.
56. Anderluh, G., A. Barlič, ..., G. Menestrina. 2000. Lysine 77 is a key residue in aggregation of equinatoxin II, a pore-forming toxin from sea anemone *Actinia equina*. *J. Membr. Biol.* 173:47–55.
57. Miles, A. J., A. Drechsler, ..., F. Separovic. 2008. The effects of lipids on the structure of the eukaryotic cytolytic equinatoxin II: a synchrotron radiation circular dichroism spectroscopic study. *Biochim. Biophys. Acta.* 1778:2091–2096.
58. García-Linares, S., R. Richmond, ..., A. Martínez-Del-Pozo. 2014. The sea anemone actinoporin (Arg-Gly-Asp) conserved motif is involved in maintaining the competent oligomerization state of these pore-forming toxins. *FEBS J.* 281:1465–1478.
59. Malovrh, P., A. Barlič, ..., G. Anderluh. 2000. Structure-function studies of tryptophan mutants of equinatoxin II, a sea anemone pore-forming protein. *Biochem. J.* 346:223–232.
60. Cheng, J., R. Goldstein, ..., M. F. Roberts. 2013. The cation- $\pi$  box is a specific phosphatidylcholine membrane targeting motif. *J. Biol. Chem.* 288:14863–14873.
61. Gutiérrez-Aguirre, I., P. Trontelj, ..., G. Anderluh. 2006. Membrane binding of zebrafish actinoporin-like protein: AF domains, a novel superfamily of cell membrane binding domains. *Biochem. J.* 398:381–392.
62. Monastyrnaya, M., E. Leychenko, ..., E. Kozlovskaya. 2010. Actinoporins from the sea anemones, tropical *Radianthus macrodactylus* and northern *Oulactis orientalis*: comparative analysis of structure-function relationships. *Toxicon.* 56:1299–1314.
63. Wimley, W. C., and S. H. White. 1996. Experimentally determined hydrophobicity scale for proteins at membrane interfaces. *Nat. Struct. Biol.* 3:842–848.
64. Tanaka, K., J. M. M. Caaveiro, ..., K. Tsumoto. 2015. Structural basis for self-assembly of a cytolytic pore lined by protein and lipid. *Nat. Commun.* 6:6337.
65. Schön, P., A. J. García-Sáez, ..., P. Schwillle. 2008. Equinatoxin II permeabilizing activity depends on the presence of sphingomyelin and lipid phase coexistence. *Biophys. J.* 95:691–698.
66. Barlič, A., I. Gutiérrez-Aguirre, ..., J. M. González-Mañas. 2004. Lipid phase coexistence favors membrane insertion of equinatoxin-II, a pore-forming toxin from *Actinia equina*. *J. Biol. Chem.* 279:34209–34216.
67. Drechsler, A., G. Anderluh, ..., F. Separovic. 2010. Solid-state NMR study of membrane interactions of the pore-forming cytolytic equinatoxin II. *Biochim. Biophys. Acta.* 1798:244–251.

# Supplementary Material for:

## Characterization of Lipid-Binding Site of Equinatoxin II by NMR and Molecular Dynamics Simulation

Daniel K. Weber<sup>a</sup>, Shenggen Yao<sup>b</sup>, Nejc Rojko<sup>c</sup>, Gregor Anderluh<sup>c</sup>, Terry P. Lybrand<sup>d</sup>,  
Matthew T. Downton<sup>e</sup>, John Wagner<sup>e</sup> and Frances Separovic<sup>a</sup>

<sup>a</sup> *School of Chemistry, Bio21 Institute, University of Melbourne, VIC 3010, Australia*

<sup>b</sup> *Bio21 Institute, University of Melbourne, VIC 3010, Australia*

<sup>c</sup> *Laboratory for Molecular Biology & Nanobiotechnology, National Institute of Chemistry,  
Ljubljana, Slovenia*

<sup>d</sup> *Center for Structural Biology, Department of Chemistry, Vanderbilt University, Nashville TN,  
37232-8725*

<sup>e</sup> *IBM Research Collaboratory for Life Sciences, Victorian Life Sciences Computation  
Initiative, University of Melbourne, VIC 3010, Australia*

### Contents

|                          |    |
|--------------------------|----|
| 1. Figure S1 & Table S1  | S2 |
| 2. Table S2 & TableS3    | S3 |
| 3. Figure S2             | S4 |
| 4. Table S4              | S5 |
| 5. Figure S3             | S6 |
| 6. Figure S4 & Figure S5 | S7 |

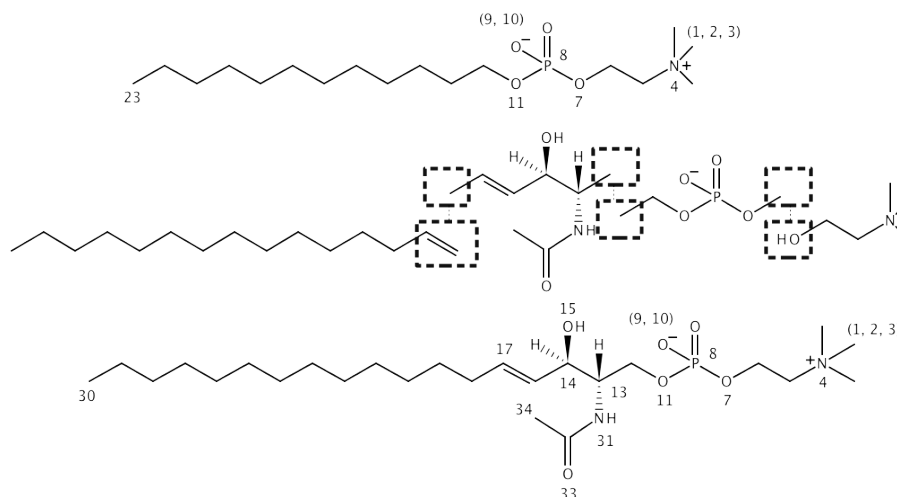

Figure S1: DPC schematic and atom nomenclature (upper). Fragment-based RESP derivation scheme used to for Ac-SM (lower).

Table S1: RESP charges and assigned GAFF/GAFFlipid atom types for DPC.

| Name            | Type | Charge  | Name      | Type | Charge  |
|-----------------|------|---------|-----------|------|---------|
| C1-C3           | c3   | -0.1438 | H15 [AIB] | hl   | -0.0121 |
| [H1-H3] [AIBIC] | hc   | 0.1235  | C16       | a3   | 0.0351  |
| N4              | n4   | 0.029   | H16 [AIB] | hl   | -0.0099 |
| C5              | c3   | -0.036  | C17       | a3   | 0.0113  |
| H5 [AIB]        | hc   | 0.1324  | H17 [AIB] | hl   | -0.0043 |
| C6              | c3   | 0.1414  | C18       | a3   | 0.0169  |
| H6 [AIB]        | hc   | 0.0548  | H18 [AIB] | hl   | -0.0092 |
| O7              | os   | -0.5766 | C19       | a3   | 0.0178  |
| P8              | p5   | 1.2266  | H19 [AIB] | hl   | -0.0101 |
| O9, O10         | o    | -0.797  | C20       | a3   | 0.0105  |
| O11             | os   | -0.5059 | H20 [AIB] | hl   | -0.0073 |
| C12             | a3   | 0.1847  | C21       | a3   | 0.0064  |
| H12 [AIB]       | hl   | 0.0059  | H21 [AIB] | hl   | 0.0002  |
| C13             | a3   | 0.0229  | C22       | a3   | 0.038   |
| H13 [AIB]       | hl   | 0.0324  | H22 [AIB] | hl   | -0.0042 |
| C14             | a3   | -0.0182 | C23       | a3   | -0.0775 |
| H14 [AIB]       | hl   | -0.0047 | H23 [AIB] | hl   | 0.0153  |
| C15             | a3   | 0.0138  |           |      |         |

Table S2: RESP charges and assigned GAFF/GAFFlipid atom types for Ac-SM.

| Name            | Type | Charge  | Name        | Type | Charge  |
|-----------------|------|---------|-------------|------|---------|
| C1-C3           | c3   | -0.143  | H20 [AIB]   | hl   | -0.0092 |
| [H1-H3] [AIBIC] | hc   | 0.1231  | C21         | a3   | 0.0255  |
| N4              | n4   | 0.0315  | H21 [AIB]   | hl   | -0.0108 |
| C5              | c3   | -0.0363 | C22         | a3   | 0.0158  |
| H5 [AIB]        | hc   | 0.1329  | H22 [AIB]   | hl   | -0.009  |
| C6              | c3   | 0.1258  | C23         | a3   | 0.0158  |
| H6 [AIB]        | hc   | 0.0594  | H23 [AIB]   | hl   | -0.009  |
| O7              | os   | -0.5005 | C24         | a3   | 0.0255  |
| P8              | p5   | 1.2328  | H24 [AIB]   | hl   | -0.0108 |
| O9, O10         | o    | -0.8009 | C25         | a3   | 0.0183  |
| O11             | os   | -0.5146 | H25 [AIB]   | hl   | -0.0086 |
| C12             | c3   | 0.2501  | C26         | a3   | 0.0158  |
| H12 [AIB]       | hc   | 0.0001  | H26 [AIB]   | hl   | -0.009  |
| C13             | c3   | -0.03   | C27         | a3   | 0.0158  |
| H13A            | hc   | 0.135   | H27 [AIB]   | hl   | -0.009  |
| C14             | c3   | 0.1385  | C28         | a3   | 0.003   |
| H14A            | hc   | 0.0925  | H28 [AIB]   | hl   | 0       |
| O15             | oh   | -0.6264 | C29         | a3   | 0.0442  |
| H15A            | ho   | 0.4203  | H29 [AIB]   | hl   | -0.0055 |
| C16             | c2   | -0.1899 | C30         | a3   | -0.0801 |
| H16A            | hc   | 0.1871  | H30 [AIBIC] | hl   | 0.0152  |
| C17             | c2   | -0.1627 | N31         | n    | -0.5588 |
| H17A            | hc   | 0.1244  | H31A        | hn   | 0.2854  |
| C18             | a3   | -0.0446 | C32         | c    | 0.6949  |
| H18 [AIB]       | hl   | 0.0394  | O33         | o    | -0.5892 |
| C19             | a3   | 0.0278  | C34         | a3   | -0.3083 |
| H19 [AIB]       | hl   | 0.0012  | H34 [AIBIC] | hl   | 0.0903  |
| C20             | a3   | 0.0178  |             |      |         |

Table S3: Additional simulation details

| Simulation                       | Atoms         | Waters        | Ions              | Time (ns) |
|----------------------------------|---------------|---------------|-------------------|-----------|
| EqII only <sup>a</sup>           | 28137         | 8465          | 7 Cl <sup>-</sup> | 100       |
| Ac-SM <sub>54</sub> <sup>b</sup> | 27633         | 7681          | -                 | 60        |
| EqII + DPC <sub>54</sub>         | 44247 / 60423 | 12737 / 18129 | 7 Cl <sup>-</sup> | 220 / 200 |
| EqII + Ac-SM <sub>54</sub>       | 57681 / 84723 | 16783 / 25797 | 7 Cl <sup>-</sup> | 220 / 200 |

<sup>a</sup> Chain A of PDB 1IAZ was used as the starting structure and solvated with 11 Å truncated octahedron. Simulations were run as described in text (9 Å cutoff used).

<sup>b</sup> Starting configuration was an interdigitated bilayer of Ac-SM units hydrated with an 8 Å shell of TIP3P water. Simulations were run as described in text (12 Å cutoff used).

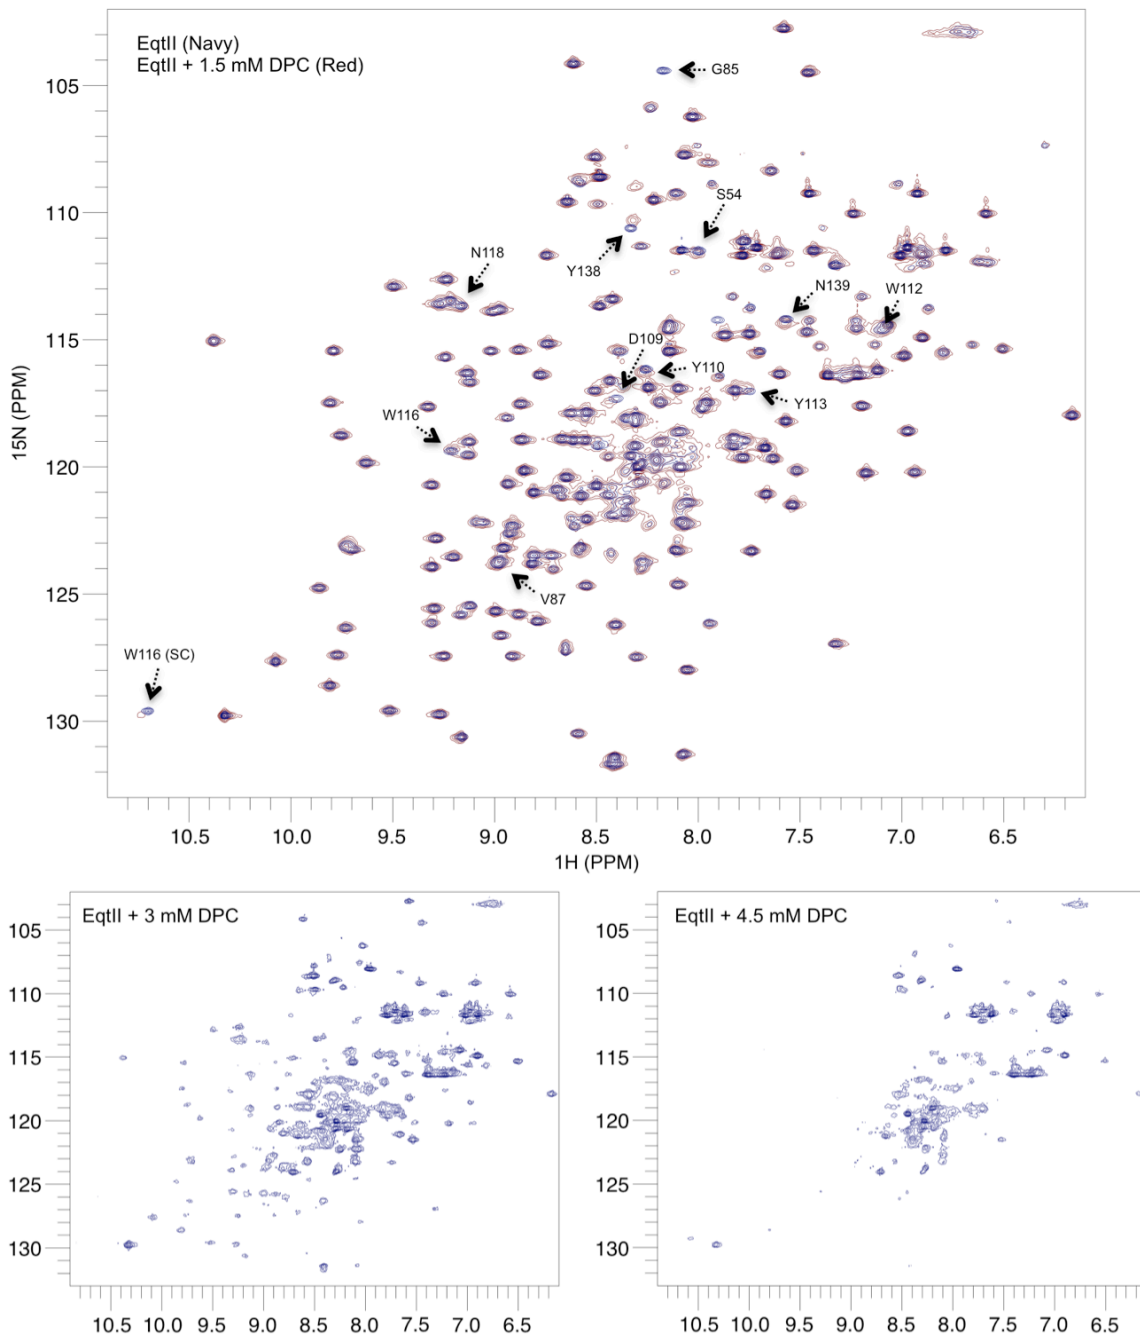

Figure S2:  $^1\text{H}$ - $^{15}\text{N}$  HSQC spectra of 0.3 mM EqtlI in buffer (10 mM sodium phosphate, 20 mM NaCl, 0.02%  $\text{NaN}_3$ , 10%  $\text{D}_2\text{O}$ , pH 5.0) show specific perturbations to loop  $\beta$ 3- $\beta$ 4 (S54), strand  $\beta$ 6 (G85, A87), loop  $\beta$ 7- $\beta$ 8 (D109, Y110, W112, Y113), strand  $\beta$ 8 (W116, W116 N $\epsilon$ /H $\epsilon$ , N118) and helix  $\alpha$ 2 (Y138, N139) regions at the CMC of DPC (*upper*). DPC concentration exceeding the CMC caused considerable reduction in spectral quality (*lower*).

### Force field comparisons

Table S4: Force-field comparison of dihedral parameters for selected DPC atoms as measured by relative trans population (%)<sup>a</sup>.

| Selected Atoms  | AMBER99SB<br>(Abel et al.) | Amber99SB <sup>b</sup> | GAFF <sup>b</sup> | GAFFlipid <sup>b</sup> |
|-----------------|----------------------------|------------------------|-------------------|------------------------|
| N4 C5 C6 O7     | 17.8                       | 30.3                   | 20.6              | 21.3                   |
| C5 C6 O7 P8     | 83.6                       | 87.6                   | 94.2              | 94.8                   |
| C6 O7 P8 O11    | 9.0                        | 21.9                   | 58.6              | 56.7                   |
| O7 P8 O11 C12   | 6.0                        | 25.3                   | 65.1              | 80.5                   |
| P8 O11 C12 C13  | 12.0                       | 93.4                   | 91.4              | 90.8                   |
| O11 C12 C13 C14 | 70.0                       | 51.3                   | 49.1              | 65.2                   |
| C12 C13 C14 C15 | -                          | 79.6                   | 80.8              | 74.3                   |
| C13 C14 C15 C16 | -                          | 81.5                   | 79.7              | 73.9                   |
| C14 C15 C16 C17 | -                          | 84.8                   | 81.0              | 75.6                   |
| C15 C16 C17 C18 | -                          | 85.5                   | 80.9              | 73.6                   |
| C16 C17 C18 C19 | -                          | 86.9                   | 82.3              | 74.7                   |
| C17 C18 C19 C20 | -                          | 86.8                   | 81.7              | 74.0                   |
| C18 C19 C20 C21 | -                          | 86.1                   | 82.6              | 74.0                   |
| C19 C20 C21 C22 | -                          | 83.3                   | 80.8              | 73.1                   |
| C20 C21 C22 C23 | -                          | 79.5                   | 76.4              | 68.3                   |
| C C C C         | 84.3                       | 83.8                   | 80.7              | 73.5                   |

<sup>a</sup> Dihedral angles were measured for each DPC residue over the final 30 ns (3000 snapshots) of a 40 ns trajectory. Trans dihedral angles were defined as occurring between  $-180^\circ$  to  $-90^\circ$  and  $90^\circ$  to  $180^\circ$ .

<sup>b</sup> Simulations were prepared by solvating an equilibrated DPC micelle in an 8 Å shell of TIP3P water. Production runs utilized the same conditions as defined in the main text. The system consisted of 17778 total atoms and 4828 water molecules.

```

EqII/1-179      1 -- SADVAGAVI DGASL SFDI L KTVL EALGNV KR K I AVGV DNE SG KTWTALNTYFRSGTSDI 59
TonC/1-179     1 -- SADVAGAVI DGASL SFDI L KTVL EALGNV KR K I AVGV DNE SG KTWTALNTYFRSGTSDI 59
FraC/1-179     1 -- SADVAGAVI DGAGL GFDV L KTVL EALGNV KR K I AVG I DNE SG KTWTAMNTYFRSGTSDI 59
EqII/1-179     1 -- SVAVAGAI I KGAA LTFNV L QTVL KALGD I BR K I AVGV DNE SG KTWTALNTYFRSGTSDI 59
EqII/1-179     1 -- SVAVAGAVI EGAT LTFNV L QTVL KALGD I BR K I AVG I DNE SG MTWTAMNTYFRSGTSDV 59
Bpl/1-179      1 -- SLAVAGAVI EGGN L VMSV L DR I L EAI G D VNR K I AIG V ENQ SG KSWTAMNTYFRSGTSDV 59
Or-G/1-173     1 - - - - - GAI I AGAA L GFNVHQTV L KALGQVSR K I AIG V DNE SG GTWTALNAYFRSGT D V 54
Or-A/1-165     1 - - - - - ATFRV L AKVL AELG K VSR K I AVGV DNE SG GSWTALNAYFRSGT D V 46
Sti/1-175      1 - - - - - ALAGT I I AGAS L TFOV L DKVL EELG K VSR K I AVG I DNE SG GTWTALNAYFRSGT D V 57
RTX-Sti/1-177 1 - - SAALAGT I I TLGAS L GFQI L DKVL GELG K VSR K I AVGV DNE SG GSWTALNAYFRSGT D V 59
RTX-A/1-175    1 - - - - - ALAGA I I AGAS L TFOI L DKVL AELGQVSR K I AIG I DNE SG GSWTAMNAYFRSGT D V 57
HmgII/1-177   1 - - SAALAGT I I EGAS L GFQI L DKVL GELG K VSR K I AVGV DNE SG GSWTALNAYFRSGT D V 59
HmT/1-177     1 - - SAALAGT I I AGAS L GFQI L DKVL GELG K VSR K I AIG V DNE SG GSWTALNAYFRSGT D V 59
Sti/1-176      1 - - - SELAGT I I DGAS L TFEV L DKVL GELG K VSR K I AVG I DNE SG GTWTALNAYFRSGT D V 58
Avi/1-179     1 - - SAAVAGAVI AGGEL ALK I LTKI L DEIG K IDR K I AIG V DNE SGL KWTALNTYKSGASD V 59
PsTX-20A/1-179 1 - - SAAVAGAVI AGGEL ALK I LTKI L DEIG K IDR K I AIG V DNE SGL KWTALNTYKSGASD V 59
Avi/1-181     1 KKSAAVAGAVI AGGEL ALK I LTKI L DEIG K IDR K I AIG V DNE SGL KWTALNTYKSGASD V 61
Src/1-178     1 - - - KAI SGGTV I AAGR L TLDL L KTL G T L G S I BR K I AIG V DNE T GGL I TGN N VYFRSGTSD 58

EqII/1-179     60 V LPHKVPFHG KALLYNGQ KDRG PVATGAVGV LAY LMSDGN TLAVL FSVR PYD YN WY SNWVN VR 120
TonC/1-179     60 V LPHKVPFHG KALLYNGQ KDRG PVATGAVGV LAY LMSDGN TLAVL FSVR PYD YN WY SNWVN VR 120
FraC/1-179     60 V LPHKVAHG KALLYNGQ KNRG PVATG VVGVI AYMSDGN TLAVL FSVR PYD YN WY SNWVN VR 120
EqII/1-179     60 V LPHKVPFHG KALLYNGQ KDRG PVATGAVGV LAY AMSDGN TLAVL FSVR PYD YN WY SNWVN VR 120
EqII/1-179     60 I LPHTVPHG KALLYNGQ KDRG PVATG VVGVL AYMSDGN TLAVL FSI PEDYNLY SNWVN VK 120
Bpl/1-179      60 V LPHSVPSG KALLYDGG KTRG PVATG VVGVF AYMSDGN TLAVMFSI PYD YNLY SNWVN VK 120
Or-G/1-173     55 I LPEFVFNQ KALLYSGQ KDTG PVATGAVGV LAY YMSDGN TLGVMF SVR PFDYNLY SNWWD VK 115
Or-A/1-165     47 I LPLDLPNQ KALLYRGG KDTG PVATG VVGVL AYMSDGN TLAIL FSVR PYD YNLY SNWVN VK 107
Sti/1-175      58 I LPEFVFNQ KALLYSGR KDTG PVATGAVAA FAY YMSDGN TLGVMF SVR PFDYNLY SNWWD VK 118
RTX-Sti/1-177 60 I LPEFVFNQ KALLYSGR KDTG PVATGAVAA FAY YMSDGN TLGVMF SVR PFDYNLY SNWWD VK 120
RTX-A/1-175    58 I LPEFVFNQ KALLYSGR KNRG PD T GAVGAL AY YMSDGN TLGVMF SVR PFDYNLY SNWWD VK 118
HmgII/1-177   60 I LPEFVFNQ KALLYSGR KDTG PVATGAVAA FAY YMSDGN TLGVMF SVR PFDYNLY SNWWD VK 120
HmT/1-177     60 I LPEFVFNQ KALLYSGR KDTG PVATGAVAA FAY YMSDGN TLGVMF SVR PFDYNLY SNWWD VK 120
Sti/1-176      59 I LPEVVPNT KALLYSGR KSSG PVATGAVAA FAY YMSDGN TLGVMF SVR PFDYNLY SNWWD VK 119
Avi/1-179     60 T LPEVEVNS KALLYTAR KSKG PVARGAVGV LAY KMSSGN TLAVMFSV R PFDYNLY SNWVN VK 120
PsTX-20A/1-179 60 T LPEVEVNS KALLYTAR KSKG PVARGAVGV LAY KMSSGN TLAVMFSV R PFDYNLY TNWVN VK 120
Avi/1-181     62 T LPEVEVNS KALLYTAR KSKG PVARGAVGV LAY KMSSGN TLAVMFSV R PFDYNLY TNWVN VK 122
Src/1-178     59 I LPHRVETGEAL LYTAR KTKG PVATGAVGV VFTYYL SDGN TLAVL FSVR PFDYNLY SNWVN VK 119

EqII/1-179     121 I YKGRRRADQRM YEEL YYNL S PFRGDNGWH TRN LG - YGLKSRGFMN SSGHAI LEIHVSKA 179
TonC/1-179     121 I YKGRRRADQRM YEEL YYNL S PFRGDNGWH TRN LG - YGLKSRGFMN SSGHAI LEIHVSKA 179
FraC/1-179     121 I YKGRRRADQRM YEEL YYNL S PFRGDNGWH SRGLG - YGLKSRGFMN SSGHAI LEIHVTKA 179
EqII/1-179     121 I YKGRRRADQRM YEEL YYNL S PFRGDNGWH ERHLG - YGLKSRGFMN SSGQA I LEIHVTKA 179
EqII/1-179     121 V YKGRRRADQRM YEEL YYNL S PFRGDNGWH NRDLG - YGLKGRGFMN SSGQSI LEIHVTKA 179
Bpl/1-179      121 T YSGMKRRADQSM YEDLYYHASP FKGDNNGWH SRNLG - YGLKCRGFMN SSGAAKLEIHVSRA 179
Or-G/1-173     116 V YRGRRRADQAMY EGLLYG - I PYGGDNGWH ARKLG - YGLKGRGFMK SSGAOSI LEIHVTKA 173
Or-A/1-165     108 V YSGKRRADQGM SEDLSYG - NPYGGDNGWH ARKLA - YGLKERGFMK SSGAOSI LEIHATKA 165
Sti/1-175      119 I YSGKRRADQGM YEDLYYG - NPYRGDNGWH EKNLG - YGLRMKG I MTSAGEAKMOI KISR - 175
RTX-Sti/1-177 121 I YSGKRRADQAMY EDMYYG - NPYRGDNGWH QKNLG - YGLKMKG I MTSAGEAILEIRISR - 177
RTX-A/1-175    119 V YSGKRRADQAMY EDLYYS - NPYRGDNGWH QKNLG - YGLKMKG I MTSAGEAILEIRISR - 175
HmgII/1-177   121 V YSGKRRADQGM YEDMYYG - NPYRGDNGWH QKNLG - YGLRMKG I MTSAGEAILEIRISR - 177
HmT/1-177     121 V YSGKRRADQGM YEDMYYG - NPYRGDNGWH QKNLG - YGLRMKG I MTSAGEAILEIRISR - 177
Sti/1-176      120 I YPSKRRADQGM YEDMYYG - NPYRGDNGWH QKNLG - YGLRMKG I MTSAGEAKMOI KISR - 176
Avi/1-179     121 I YDGEKKAD EKMYN ELYNNNPI KP - STWEKRD LGK DGLKLRGFM TSNGDAKLVHI EKS 179
PsTX-20A/1-179 121 I YDGEKKAD EKMYN ELYNNNPI KP - SIWEKRD LGQDGLKLRGFM TSNGDAKLVHI EKS 179
Avi/1-181     123 I YDGEKKAD EKMYN ELYNNNPI KP - SIWEKRD LGQDGLKLRGFM TSNGDAKLVHI EKS 181
Src/1-178     120 I YSGKRNAD YDMYHE LYYDAN PFEEDDTWEYR YLG - YGMRMED YMN SSGEAL K I TVMPD 178

```

Figure S3: Actinoporin protein sequence alignments. Uniprot accession codes and sequence identities relative to EqII are detailed in the main text. Alignments were performed using the Clustal Omega webserver. The figure was created using Jalview 2.8.1 with highly conserved residue color-shaded according to conservation.



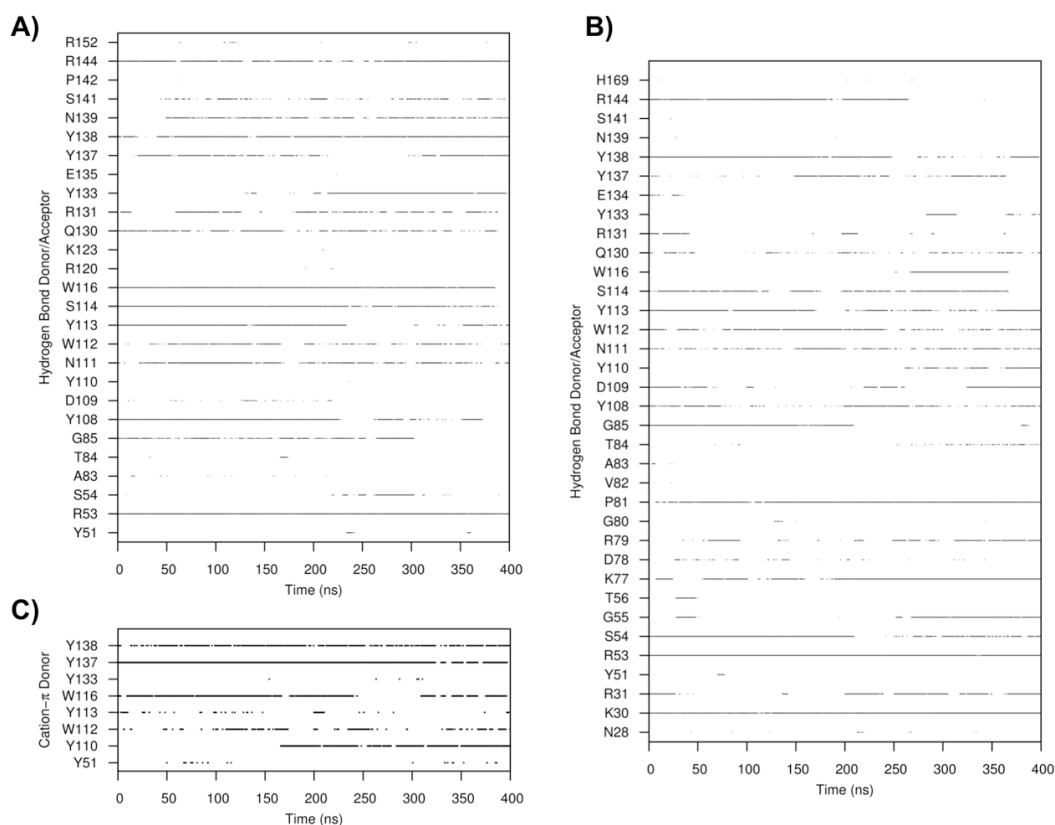

Figure S4: Per-residue time evolution profiles of H-bonds to (A) DPC, and (B) Ac-SM residues; and (C) cation- $\pi$  interactions to Ac-SM residues. Trajectories were analyzed over 40000 frames.

### Size estimates of DPC and Ac-SM

Dynamic light scattering measurements were made using a Malvern Zetasizer Nano ZS in 173° backscattering mode. Triplicate readings for Ac-SM were made at 2, 4, 8, 16, 64, 128  $\mu\text{M}$  in water. DPC was measured at 128 mM. All readings were made at 25 °C and analyses using manufacturer's software. The reported hydrodynamic radius of Ac-SM was averaged over all measurements over 4  $\mu\text{M}$ , where signal quality was adequate.

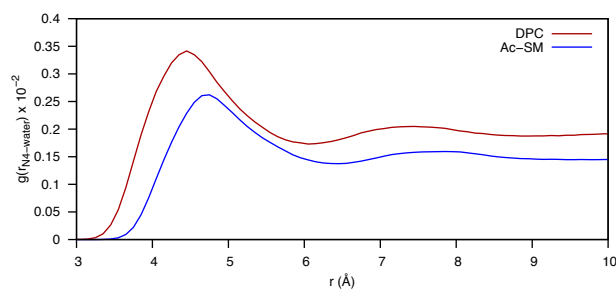

Figure S5: Radial pair distribution of water to the choline nitrogen of DPC and Ac-SM.
